# Supplementary material for: Efficient methanol carbonylation to methyl acetate catalyzed by a cyclic(alkyl)(amino)carbene iridium complex
Source: Royal Society of Chemistry journal article supplement (doi:10.1039/d0cy00054j), 2020-01-01
Supplement: d0cy00054j1.pdf [file d0cy00054j1.pdf]

# Efficient Methanol Carbonylation to Methyl Acetate Catalyzed by Cyclic(alkyl)(amino)carbene Iridium Complex

Dejin Zhang,<sup>ab</sup> Guoqiang Yang,<sup>a</sup> Yue Zhao,<sup>a</sup> Shouyan Shao,<sup>c</sup> Guisheng Zhu,<sup>c</sup> Peijun Liu,<sup>c</sup> Jia Liu,<sup>a</sup> Xingbang Hu\*<sup>a</sup> and Zhibing Zhang\*<sup>a</sup>

<sup>a</sup> School of Chemistry and Chemical Engineering, Nanjing University, Nanjing 210093, P. R. China.

<sup>b</sup> School of Chemistry and Chemical Engineering, Suzhou University, Suzhou 234000, P. R. China.

<sup>c</sup> Jiangsu SOPO (Group)CO.,LTD, Zhengjiang,212006,P. R. China.

## Index

1. General considerations
2. Synthesis and characterization
3. General procedure for catalytic methanol carbonylation reactions
4. Optimization of reaction conditions
5. Original NMR spectra
6. Original MS spectra
7. IR spectra of C-3, C-4 and (NHC)Ir(CO)<sub>2</sub>Cl
8. XRD spectra of C-3 and C-4
9. Crystal data for C-2
10. Crystal data for C-3
11. Theoretical calculation method
12. Cartesians coordinates of the optimized structures
13. TGA curves for C-2 and C-3

## 1. General considerations

All reactions were performed under an atmosphere of nitrogen by using standard Schlenk techniques. Solvents were dried by standard methods.  $^1\text{H}$  and  $^{13}\text{C}$  NMR spectra were recorded on a Bruker Avance 400 spectrometer. NMR multiplicities are abbreviated as follows: s = singlet, d = doublet, t = triplet, q = quartet, m = multiplet, br = broad signal. Mass spectroscopy (MS) measurements were performed on a Thermo Finnigan Q-TOF spectrometer. X-ray structure was measured with a Bruker AXS apparatus (Smart APEX II). A Shimadzu 2014C GC system was used to monitor the reaction conversion.

## 2. Synthesis and characterization

### 2.1 Synthesis and characterization of C-2

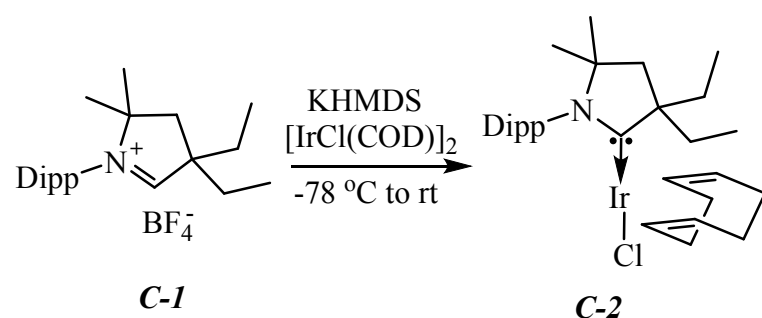

C-1 was prepared according to references.<sup>13</sup> Then, C-1 was used to synthesis C-2.

A certain amount of C-1 (0.4012 g), potassium bis(trimethylsilyl)amide (0.2194 g) and [Ir(COD)Cl]<sub>2</sub> (0.1678 g) was put in a dried Schlenk bottle under nitrogen atmosphere. THF was added by syringe at -78°C under nitrogen, then the mixture was warmed to room temperature and stirred for 12 h. All volatiles were evaporated to dryness. Diatomite was employed to remove salts in the crude product. Finally, the residue was purified by column chromatography on silica gel with benzene and n-hexane (1:2) as eluent. After removing the solvent, C-2 was obtained as yellow powder (yield: 75%). Single crystals were obtained at room temperature from an ether solution.  $^{13}\text{C}$  NMR (100 MHz, CDCl<sub>3</sub>)  $\delta$  (ppm) 261.18 (C<sub>carben</sub>), 148.10, 146.42, 137.64, 128.90, 87.28, 83.53, 56.31, 48.73, 28.95, 28.35, 32.37, 31.11, 48.62, 36.48,

28.02, 25.29, 33.78, 27.25, 26.62, 26.33, 25.59, 24.41, 12.43, 9.71;  $^1\text{H}$  NMR (400 MHz,  $\text{CDCl}_3$ )  $\delta$  (ppm) 7.39 (d, 2H), 7.14 (t, 1H), 4.91 (t, 1H), 4.23 (m, 1H), 3.78 (m, 1H), 2.97 (m, 1H), 2.69 (m, 1H), 2.32 (m, 1H), 1.98 (m, 3H), 1.79 (m, 3H), 1.59 (m, 4H), 1.56 (m, 3H), 1.39 (m, 5H), 1.27 (m, 12H), 1.19 (m, 4H), 1.02 (m, 2H). HRMS (m/z):  $[\text{M}-\text{Cl}]^+$  calculated for  $\text{C}_{30}\text{H}_{47}\text{NIr}^+$ , 614.3338; found 614.3335. Elemental analysis for  $\text{C}_{30}\text{H}_{47}\text{ClIrN}$ , calculated: C, 55.49; H, 7.30; N, 2.16; Found: C, 55.33; H, 7.41; N, 2.28.

## 2.2 Synthesis and characterization of C-3 and C-4

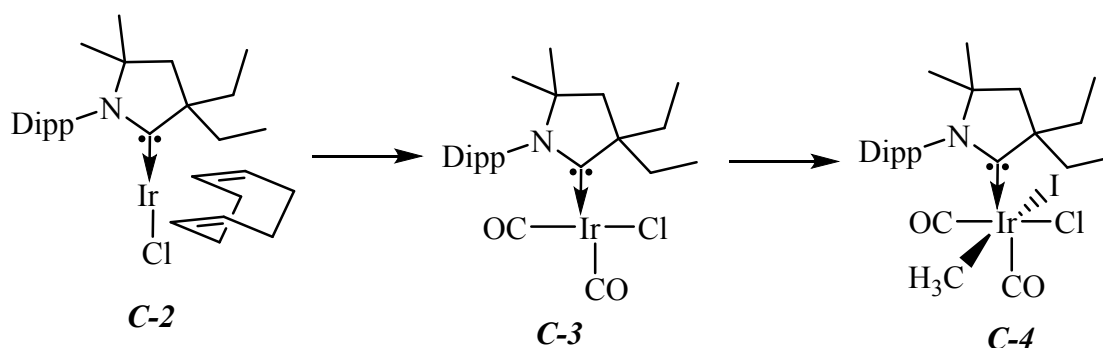

0.1 g C-2 was dissolved in 5 mL  $\text{CH}_2\text{Cl}_2$ . The obtained solution was transferred into a high-pressure autoclave (50 mL). The reactor was purged with CO to remove air. Then, CO was charged into the autoclave to 1 MPa. The reactor was stirred at room temperature for 8 h. After the reaction, the solvent was evaporated and 5 mL  $\text{CCl}_4$  was used to wash the product. All volatiles were evaporated to dryness, and C-3 was obtained as a yellow solid (yield: 87%). Single crystals were obtained at room temperature from an ether solution.  $^{13}\text{C}$  NMR (100 MHz,  $\text{CDCl}_3$ )  $\delta$  (ppm) 253.23 ( $\text{C}_{\text{carben}}$ ), 181.52, 170.44 (carbonyl carbon), 146.21, 134.29, 129.60, 125.54, 30.20, 29.11, 25.08, 10.64, 31.89, 44.16, 29.01;  $^1\text{H}$  NMR (400 MHz,  $\text{CDCl}_3$ )  $\delta$  (ppm) 7.43 (t, 1H), 7.31 (d, 2H), 2.98 (m, 2H), 2.29 (m, 2H), 2.03 (s, 2H), 1.91 (m, 2H), 1.38 (d, 6H), 1.32 (t, 12H), 1.19 (t, 6H). HRMS (m/z):  $[\text{M}-\text{Cl}]^+$  calculated for  $\text{C}_{24}\text{H}_{35}\text{NO}_2\text{Ir}^+$ , 562.2297; found 562.2287. Elemental analysis for  $\text{C}_{24}\text{H}_{35}\text{ClIrNO}_2$ , calculated: C, 48.27; H, 5.91; N, 2.35. Found: C, 48.05; H, 6.01; N, 2.18.

0.05g C-3 was dissolved in 5 mL  $\text{CH}_2\text{Cl}_2$ . Then, the obtained mixture was put in a dried Schlenk bottle under nitrogen. 6  $\mu\text{L}$   $\text{CH}_3\text{I}$  was added by syringe at  $-78^\circ\text{C}$ . Then,

the mixture was warmed to room temperature and stirred for 12 h. After the reaction, all volatiles were evaporated to dryness, C-4 was obtained as yellow solid (yield: 83%).  $^{13}\text{C}$  NMR (100 MHz,  $\text{CDCl}_3$ )  $\delta$  (ppm) 253.24 ( $\text{C}_{\text{carben}}$ ), 181.52, 170.44 (carbonyl carbon), 146.22, 134.30, 129.60, 125.54, 30.20, 29.12, 25.08, 10.64, 1.16 ( $\text{CH}_3\text{I}$ ). Elemental analysis for  $\text{C}_{25}\text{H}_{35}\text{ClIrNO}_2$ , calculated: C, 40.62; H, 5.18; N, 1.90. Found: C, 40.74; H, 5.34; N, 1.92. Comparing with  $^{13}\text{C}$  NMR of  $\text{CH}_3\text{I}$  and C-3, a new C atom was obtained at 1.16 ppm, indicating the oxidative addition product C-4 was obtained.

### 2.3 Synthesis of $(\text{NHC})\text{Ir}(\text{CO})_2\text{Cl}$

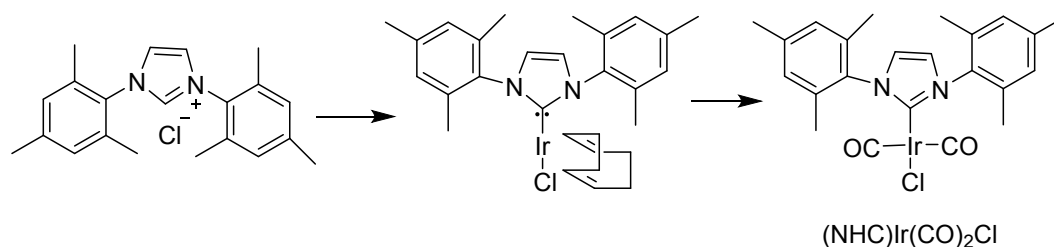

0.0856 g 1,3-bis(2,4,6-trimethylphenyl)imidazolium chloride, 0.0548 g KHMDS and 0.0844 g  $[\text{Ir}(\text{COD})\text{Cl}]_2$  were put into a dried Schlenk bottle under nitrogen atmosphere. THF was added by syringe at  $-78^\circ\text{C}$  under nitrogen. Then the mixture was warmed to room temperature and stirred for 12 h. All volatiles were evaporated to dryness. Then 5 mL  $\text{CH}_2\text{Cl}_2$  was used to dissolve the obtained solid in a high-pressure autoclave, CO was charged into the autoclave to 1 MPa. The reactor was stirred at room temperature for 8 h. After the reaction, the solvent was evaporated and 5 mL  $\text{CCl}_4$  was used to wash the product. All volatiles were evaporated to dryness, and  $(\text{NHC})\text{Ir}(\text{CO})_2\text{Cl}$  was obtained.  $^{13}\text{C}$  NMR (100 MHz,  $\text{CDCl}_3$ )  $\delta$  (ppm) 180.17 (carbonyl carbon), 176.09 ( $\text{C}_{\text{carben}}$ ), 168.51 (carbonyl carbon), 139.47, 135.27, 134.94, 129.42 (aromatic carbon), 123.76 ( $\text{NCH}=\text{CHN}$ ), 21.34, 18.61;  $^1\text{H}$  NMR (400 MHz,  $\text{CDCl}_3$ )  $\delta$  (ppm) 7.12 (s, 2H), 7.01 (s, 4H), 2.36 (s, 6H), 2.21 (s, 12H). HRMS (m/z):  $[\text{M}-\text{Cl}]^+$  calculated for  $\text{C}_{23}\text{H}_{24}\text{N}_2\text{O}_2\text{Ir}^+$ , 553.1467; found 553.1463. Elemental analysis for  $\text{C}_{23}\text{H}_{24}\text{ClIrN}_2\text{O}_2$ , calculated: C, 46.97; H, 4.11; N, 4.76. Found: C, 47.12, H, 4.23, N, 4.66.

### 3. General procedure for catalytic methanol carbonylation reactions

The reaction was carried out in a high-pressure autoclave (50 mL) with a magnetic stirrer. In a typical experiment, 125 mmol of methanol, 0.1mol% of C-2 and 0.2 mL CH<sub>3</sub>I were loaded into the reactor. The reactor was purged with CO to remove air. Then, the CO was charged into autoclave to 2 MPa. Finally, the reactor was heated to 120°C and the solution was stirred for 24 hours. After the reaction, the conversion of methanol and selectivity of methyl acetate were determined by GC.

### 4. Optimization of reaction conditions

Effects of reaction temperature, CO pressure, the amount of CH<sub>3</sub>I and some other factors were investigated. The results were shown in Table S1, Fig. S1, Fig. S2 and Table S2.

Table S1 Effect of reaction temperature

| Entry | Temperature(°C) | Conversion (%) | Selectivity(%) |      |       |
|-------|-----------------|----------------|----------------|------|-------|
|       |                 |                | MA             | DME  | AC    |
| 1     | 100             | 55.41          | 92.91          | 7.09 | 0     |
| 2     | 120             | 79.50          | 94.87          | 5.13 | 0     |
| 3     | 150             | 83.40          | 78.69          | 8.08 | 13.23 |
| 4     | 180             | 87.26          | 67.82          | 2.98 | 29.14 |

General condition: 0.1mol% of C-2, 125 mmol methanol, 0.2mL CH<sub>3</sub>I, pressure of CO 2 MPa, 24 h. Conversion is based on methanol.

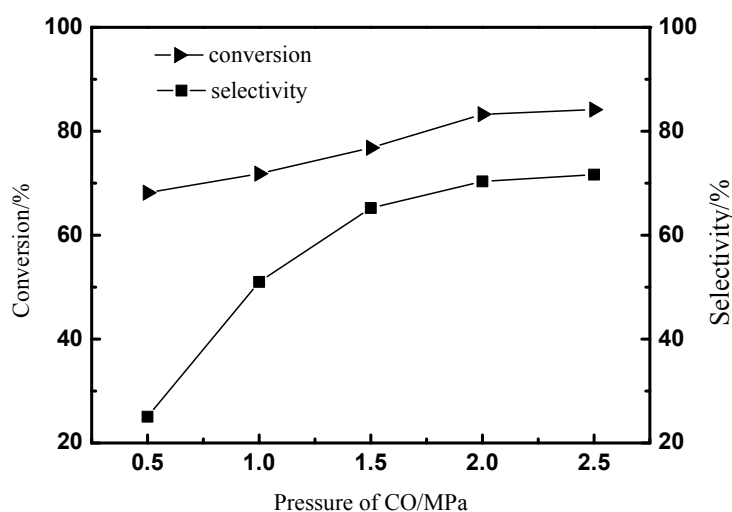

Fig.S1 Effect of CO pressure on methanol carbonylation. Reaction conditions: 0.05mol% of C-2, 125 mmol methanol, 0.2mL CH<sub>3</sub>I, 24 h.

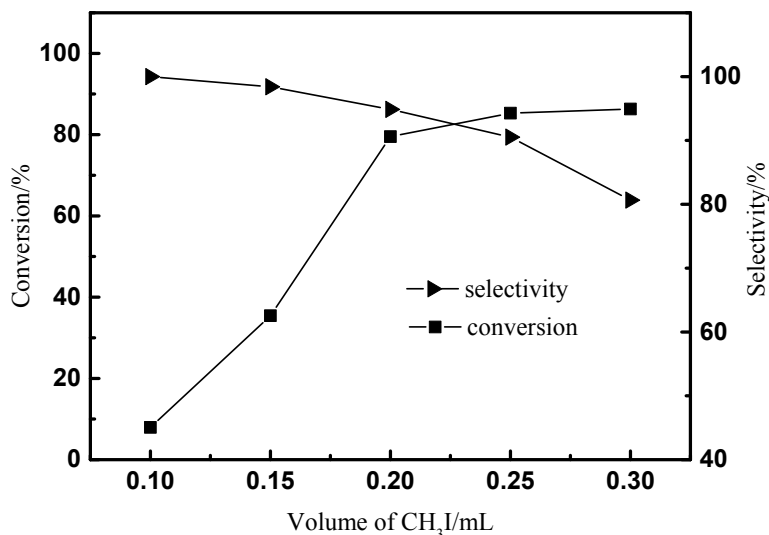

Fig.S2 Effect of CH<sub>3</sub>I on methanol carbonylation. Reaction conditions: 0.1mol% of C-2, 125 mmol methanol, 120°C, pressure of CO 2 MPa, 24 h.

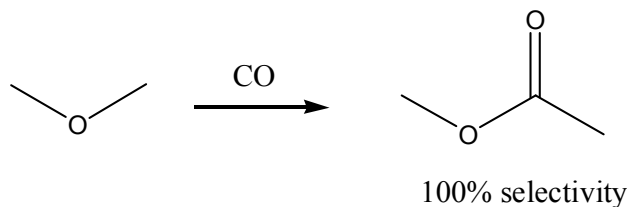

Scheme S1. The carbonylation of DME to MA. Condition: 10mg C-2, 0.2mL CH<sub>3</sub>I, 5 mL THF, 0.3 MPa DME, 2 MPa CO, 120°C, 24 h. TON= (mole amount of MA)/(mole amount of C-2)=46.

Table S2 Additional experiments of methanol carbonylation to MA in THF

| Entry          | Conversion(%) | Selectivity(%) |
|----------------|---------------|----------------|
| 1              | 61            | 100            |
| 2 <sup>a</sup> | 65            | 100            |
| 3 <sup>b</sup> | 66            | 100            |

General condition: 0.1mol% of C-2, 10 mmol methanol, 0.2mL CH<sub>3</sub>I, 5mL THF, pressure of CO 2 MPa, 120°C, 24 h. [a] 30 h of reaction time. [b] 60 h of reaction time.

## 5. Original NMR spectra.

### C-1 ( $^{13}\text{C}$ NMR)

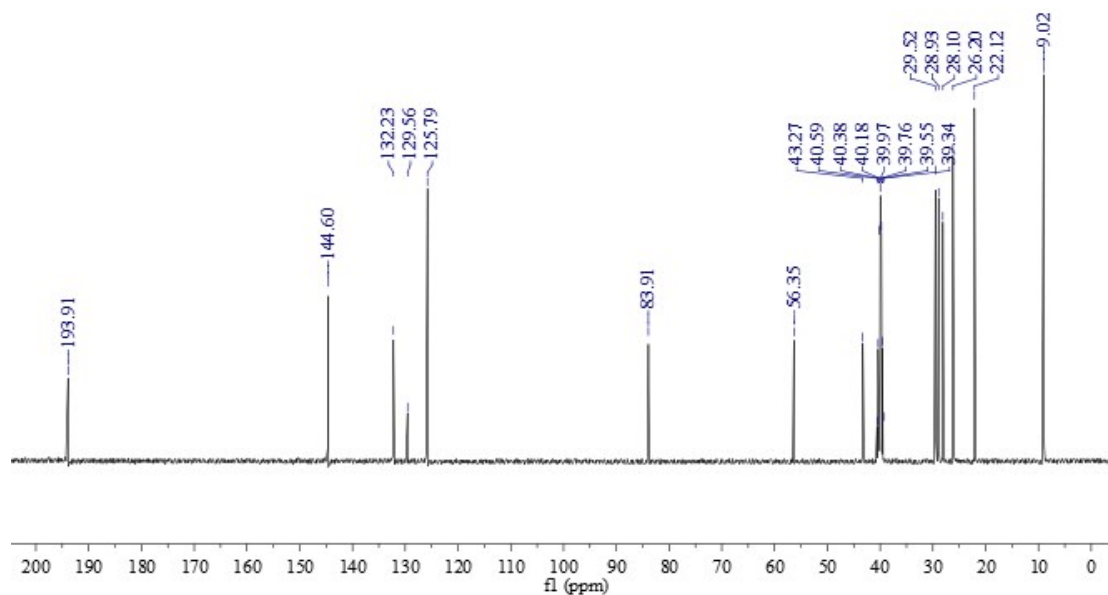

### C-1 ( $^1\text{H}$ NMR)

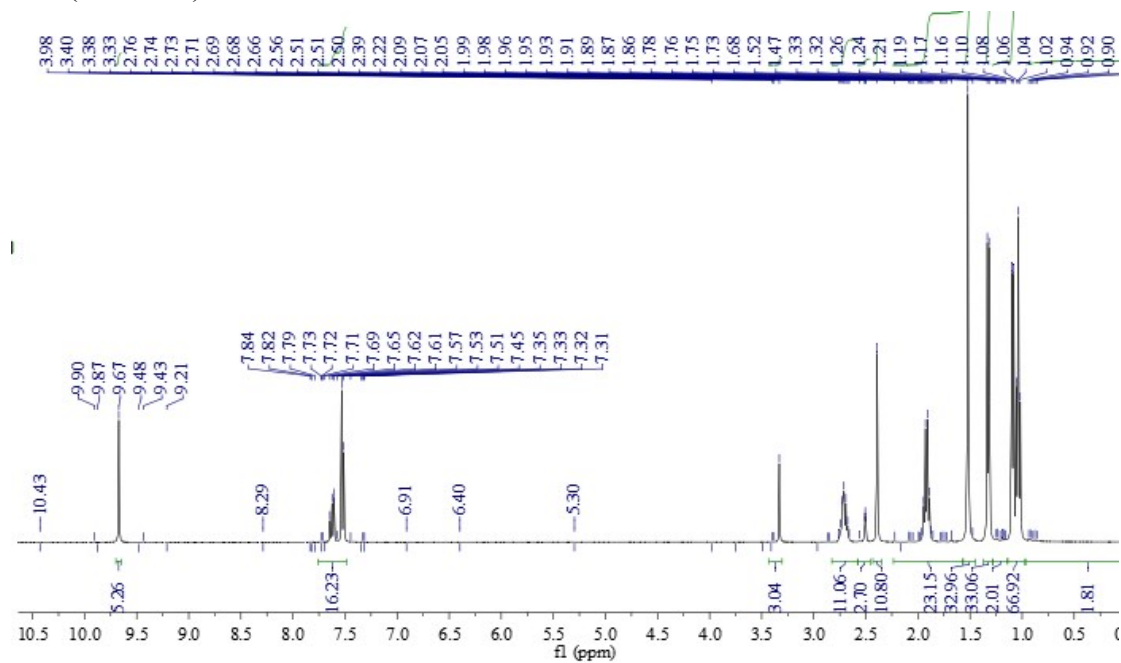

C-2 (<sup>13</sup>C NMR)

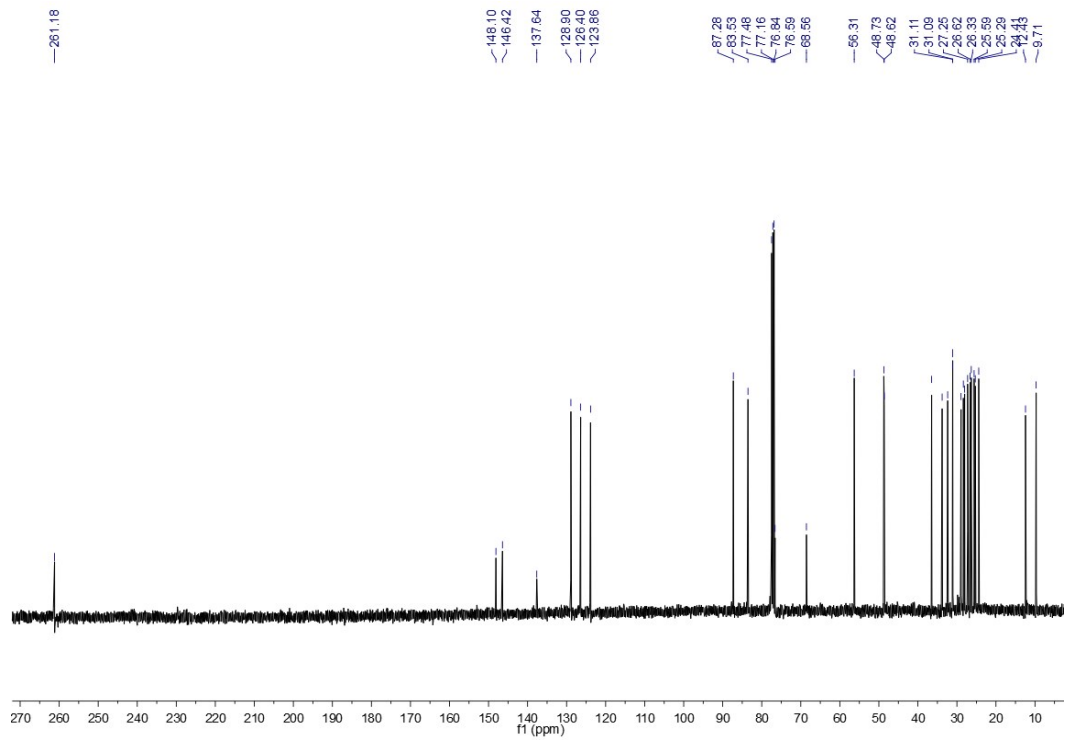

C-2 (<sup>1</sup>H NMR)

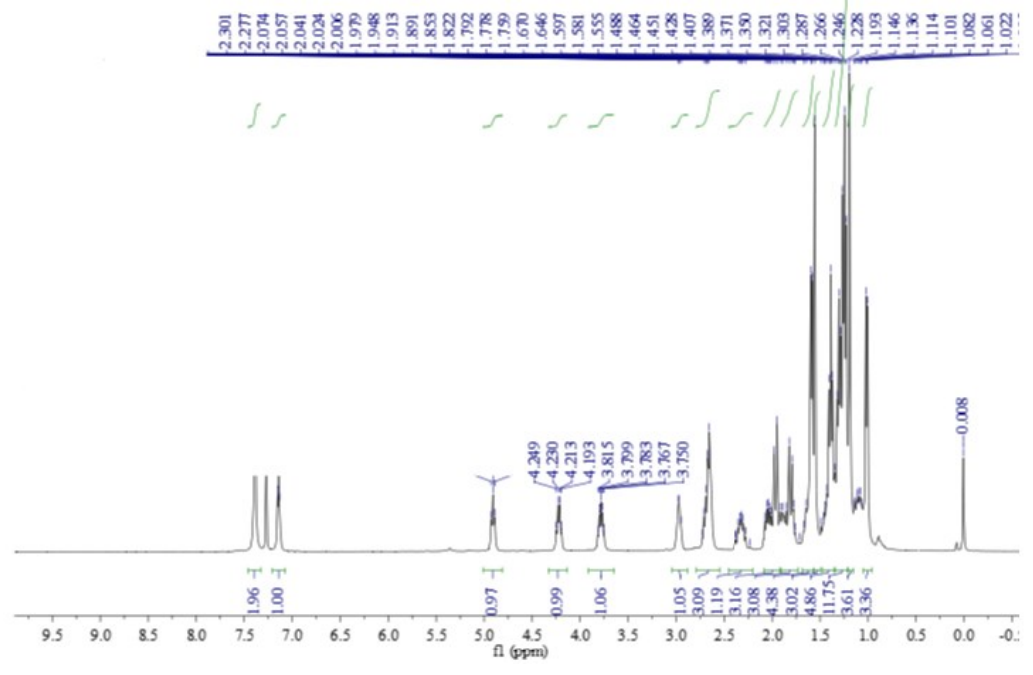



C-2 (dept135)

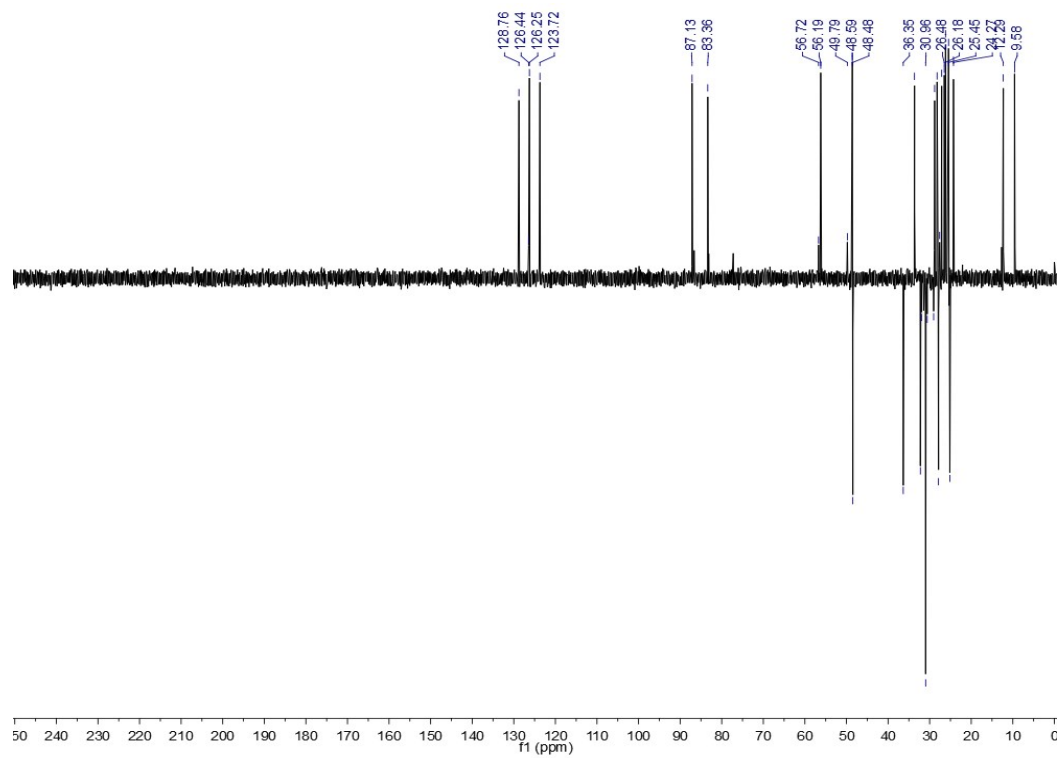

C-2 (dept90)

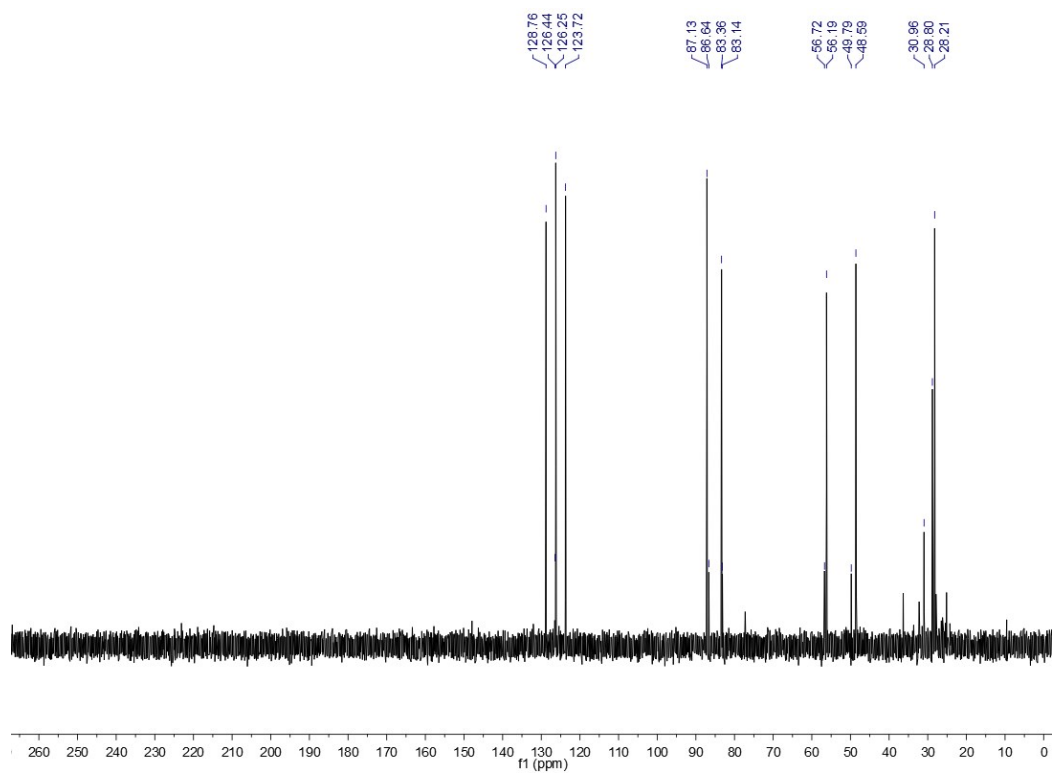

C-3 (<sup>13</sup>C NMR)

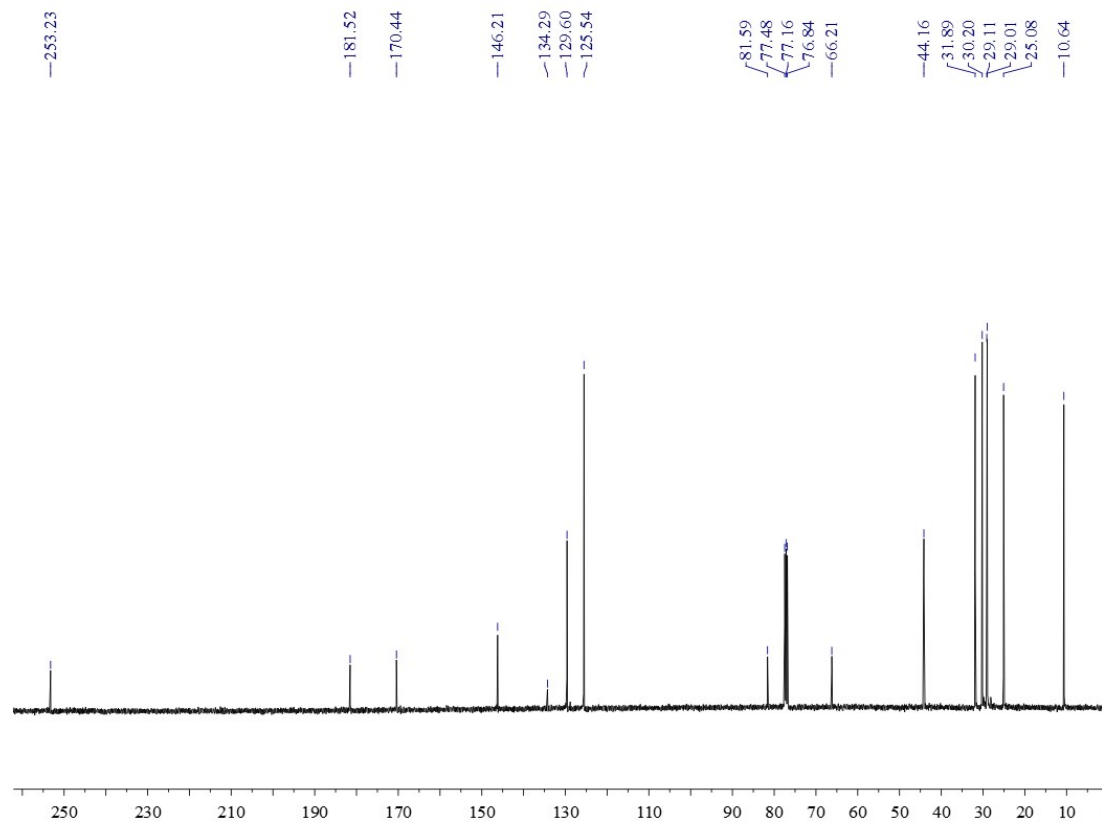

C-3 (<sup>1</sup>H NMR)

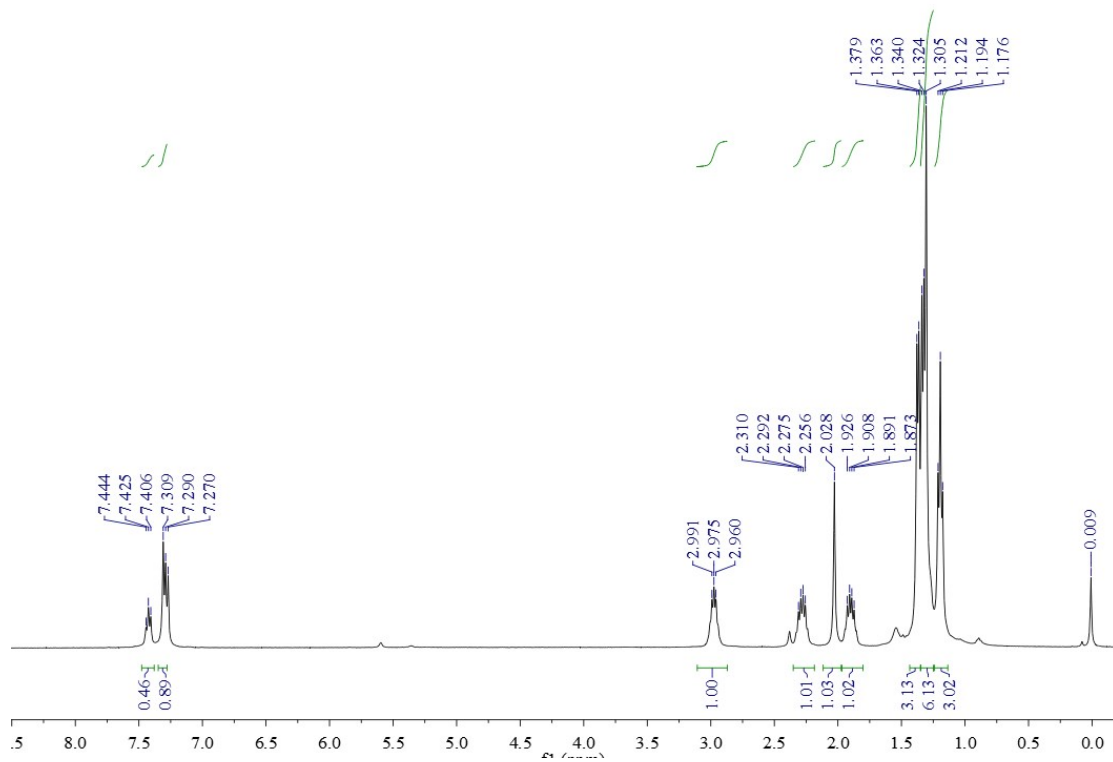

C-3 (dept135)

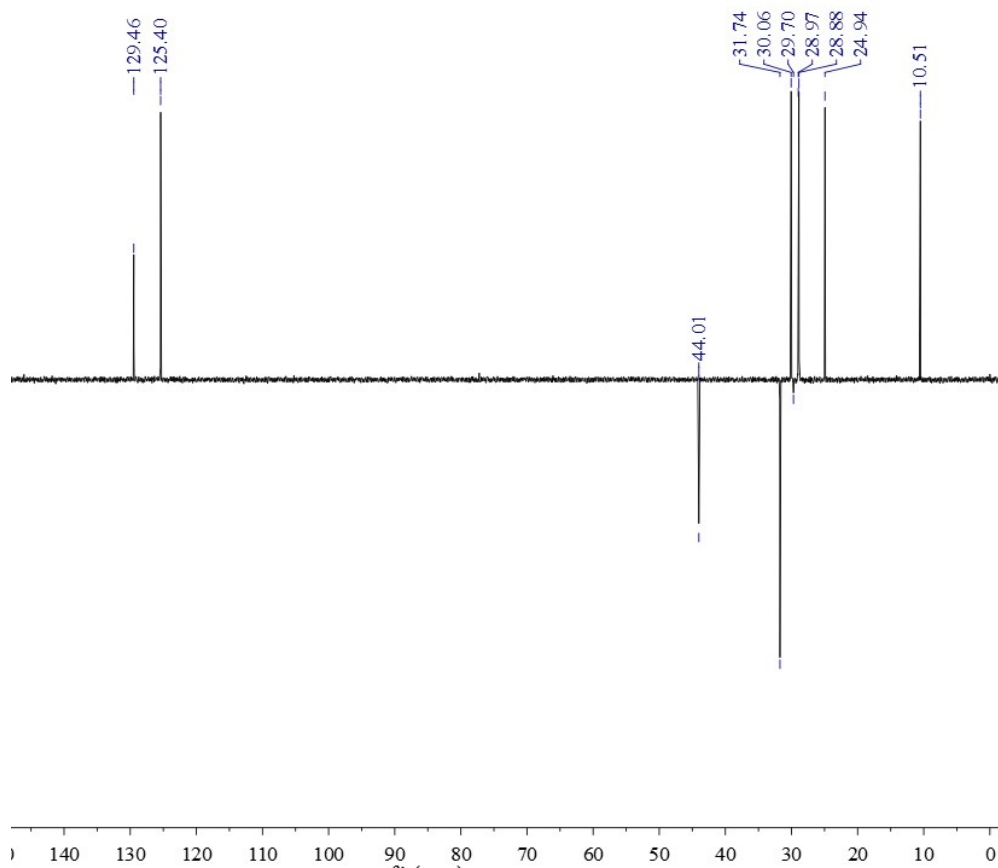

### C-3 (dept90)

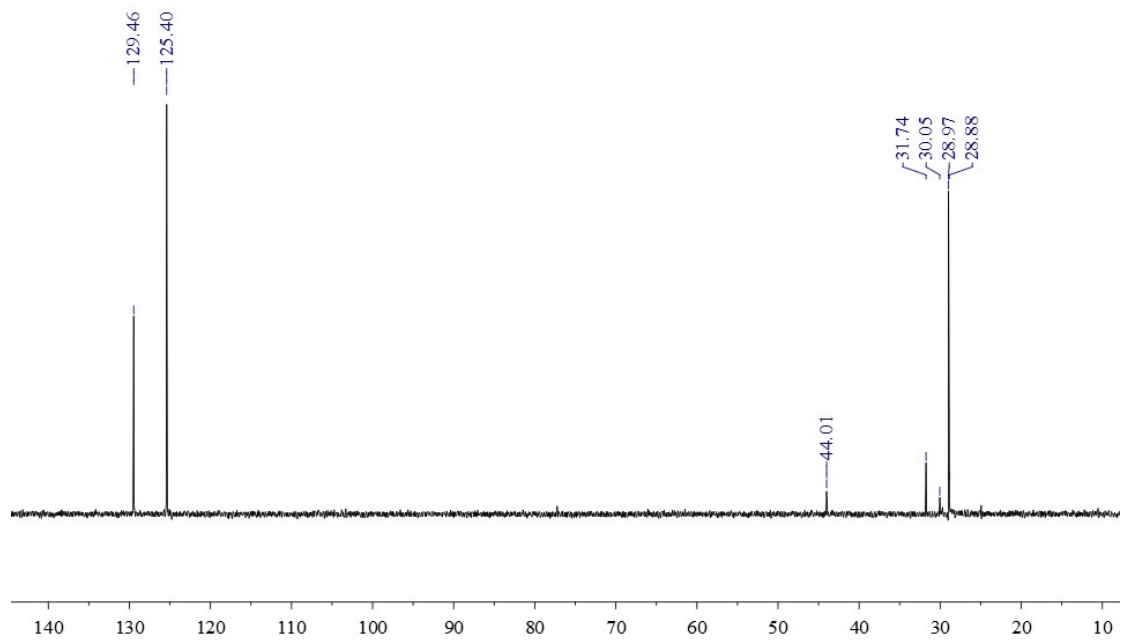

### C-4 (<sup>13</sup>C NMR)

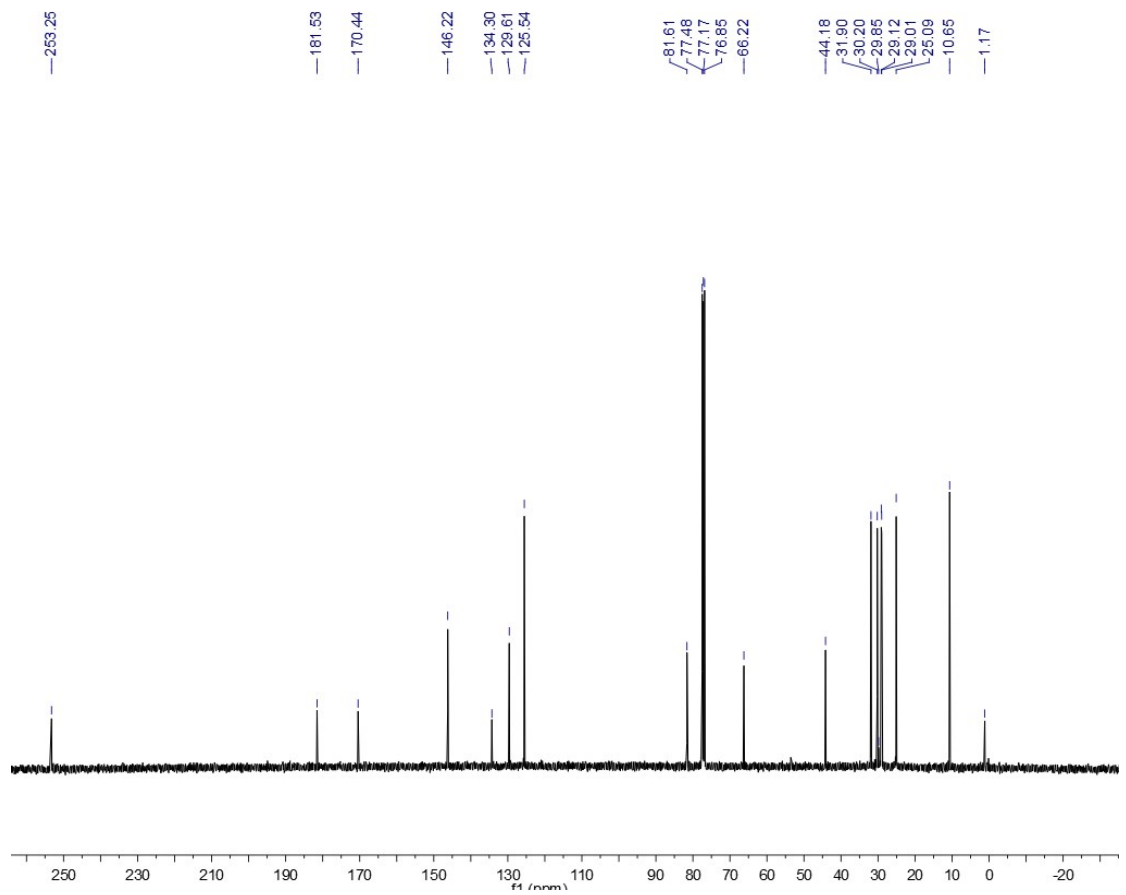

CH<sub>3</sub>I (<sup>13</sup>C NMR)

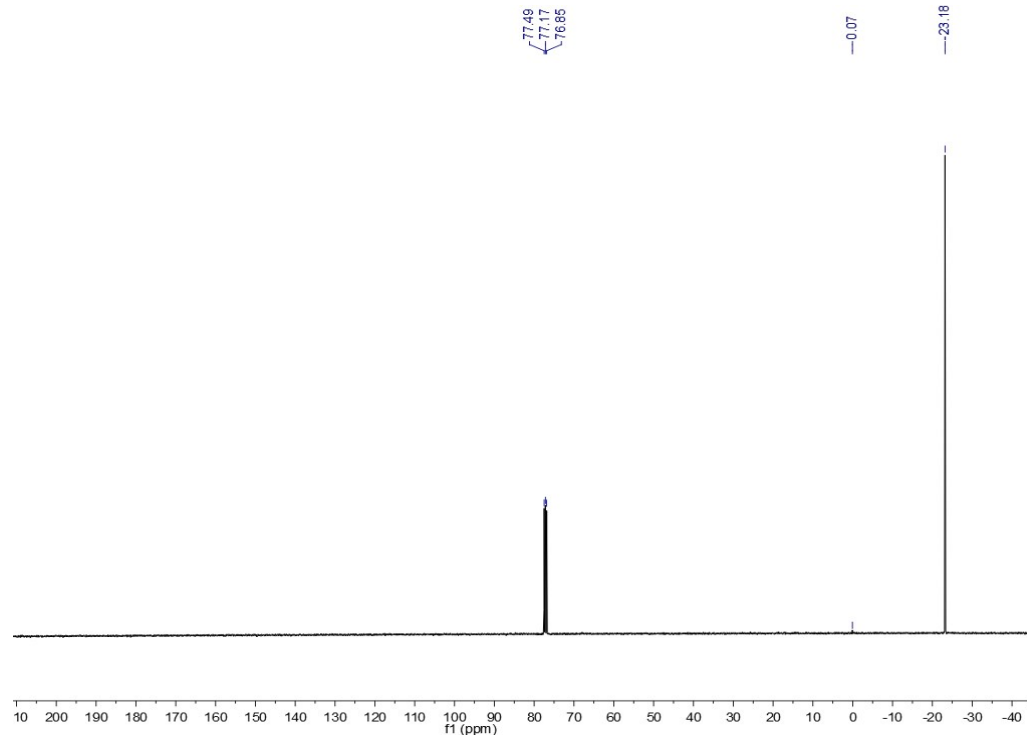

[(NHC)Ir(CO)<sub>2</sub>Cl] (<sup>13</sup>C NMR)

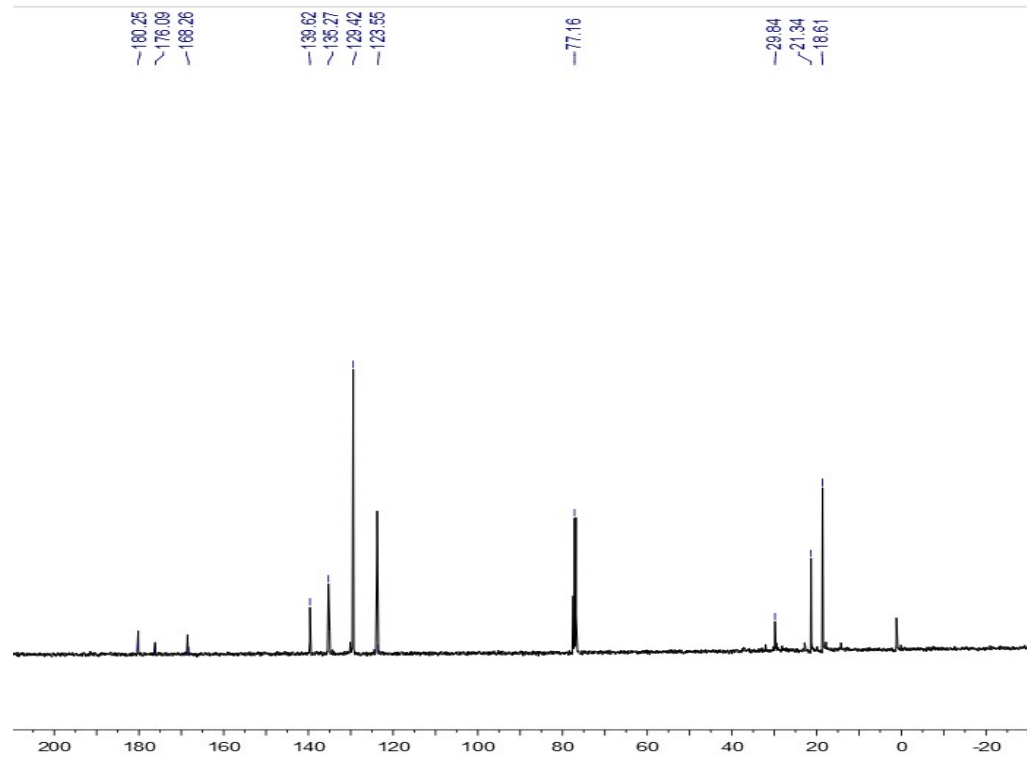

## 6. Original MS spectra

C-2

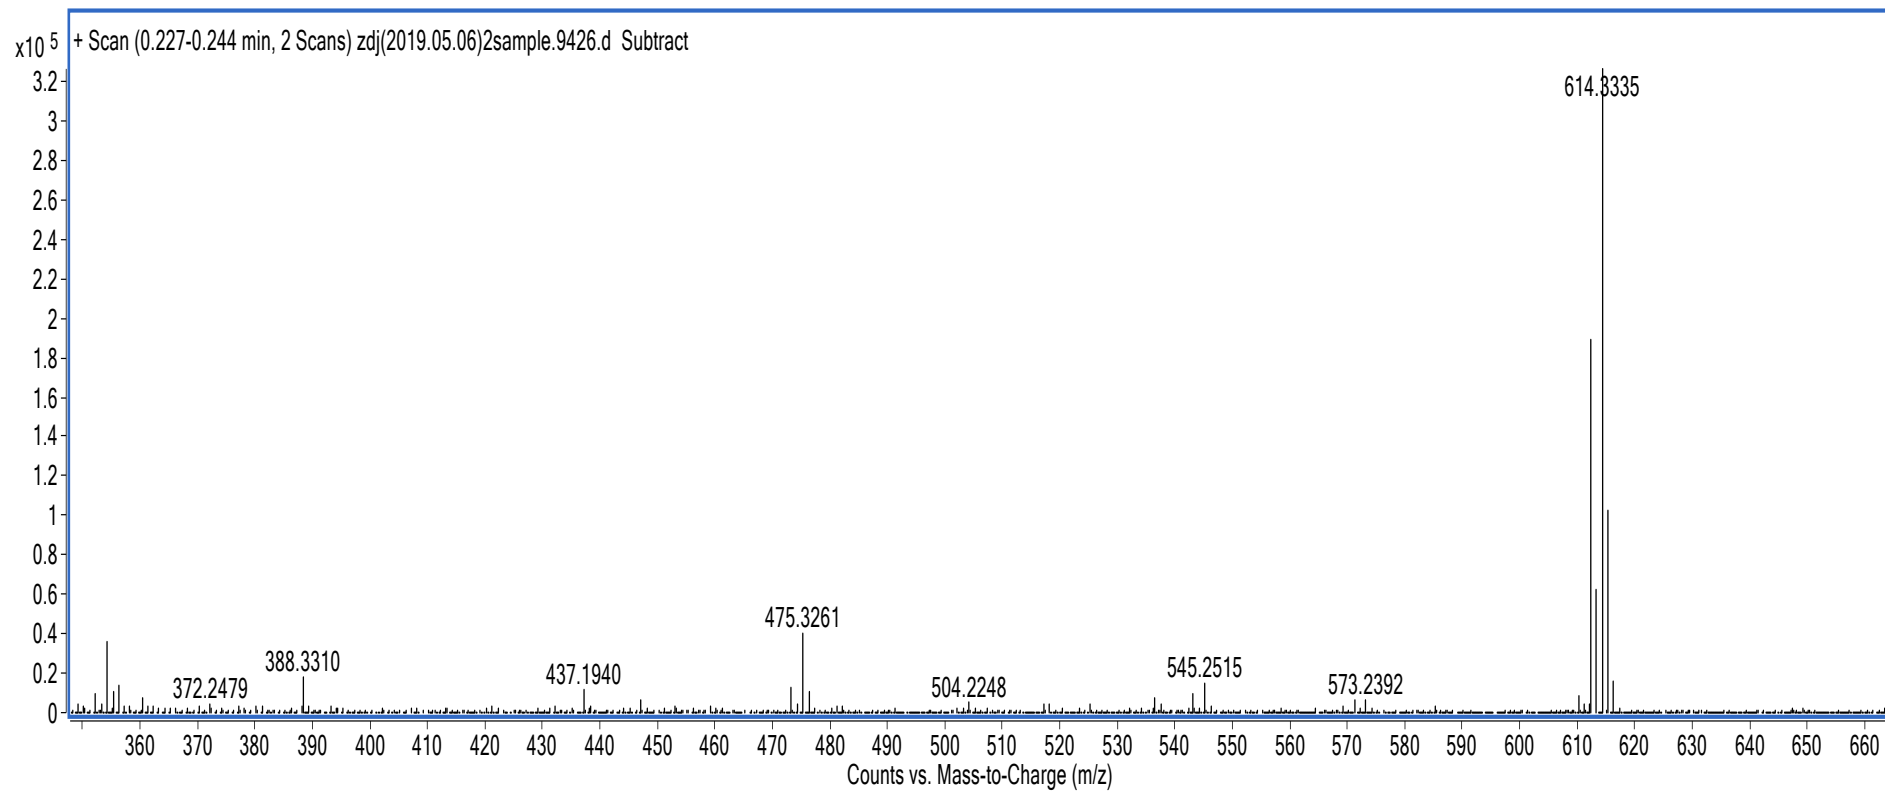

C-3

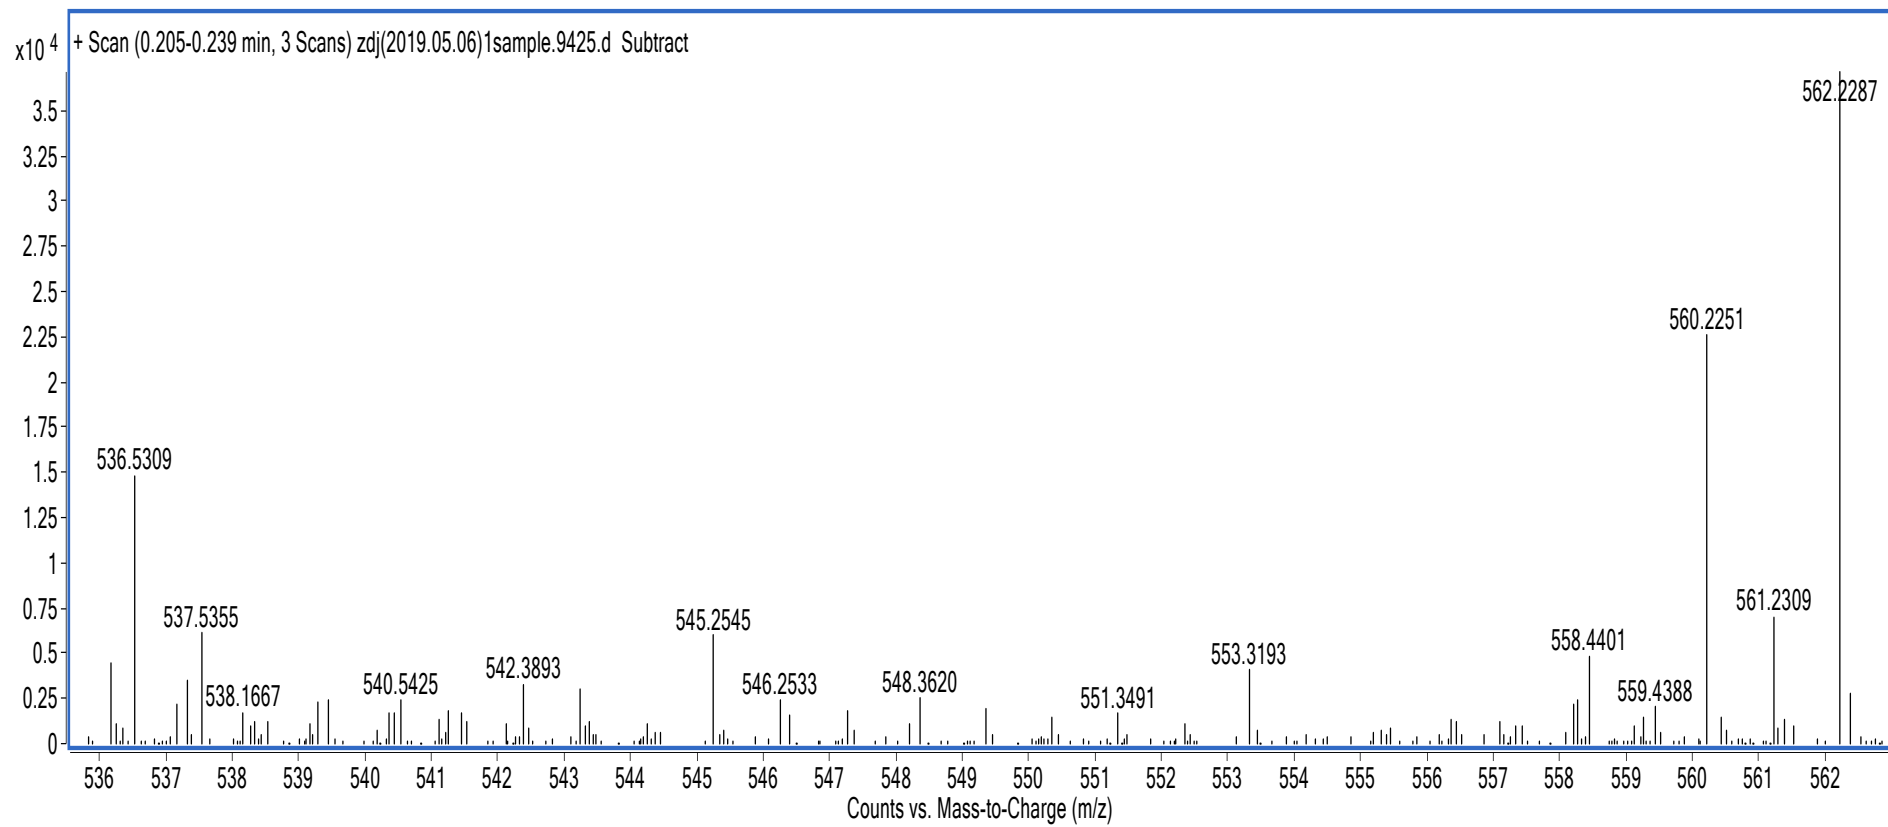

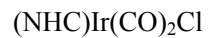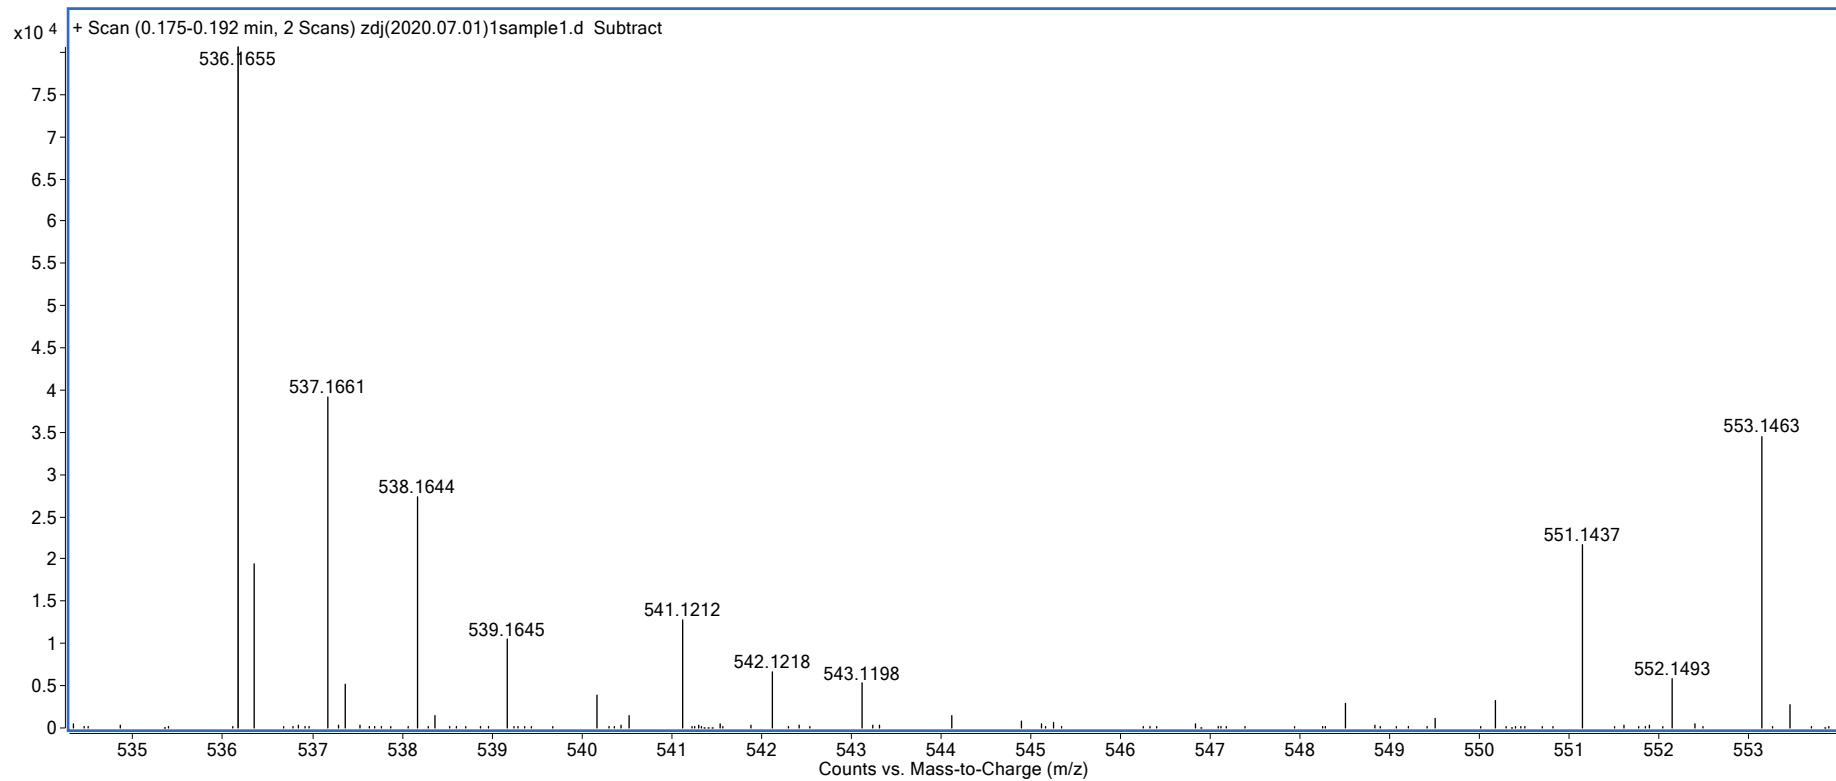



## 7. IR spectra of C-3, C-4 and (NHC)Ir(CO)<sub>2</sub>Cl

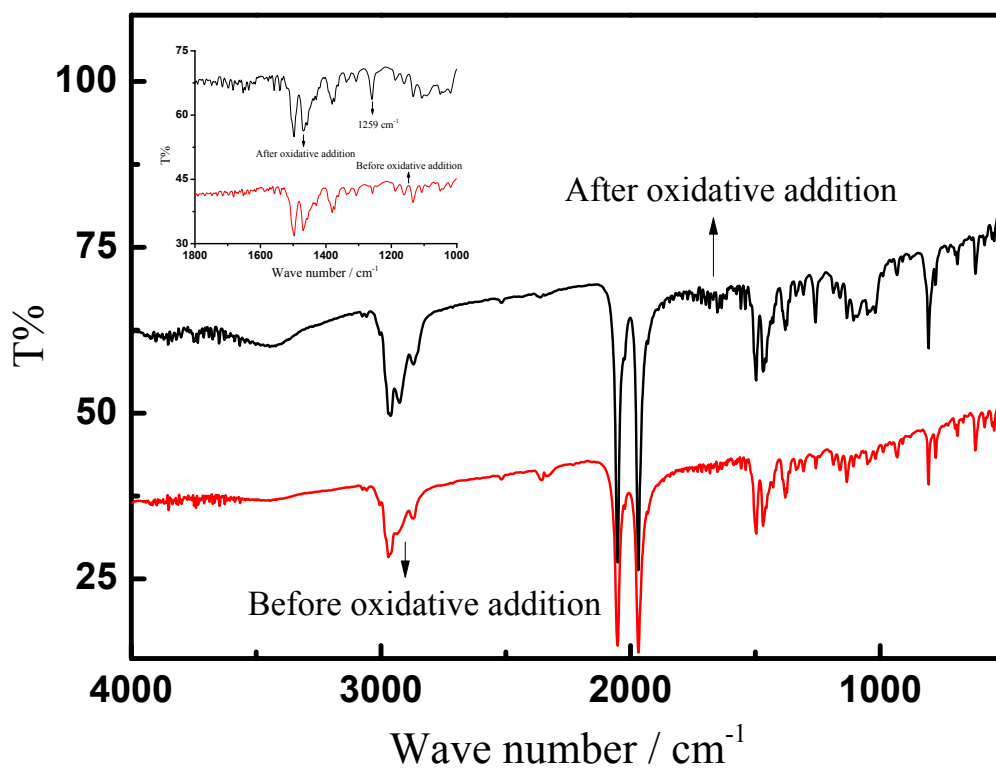

Fig.S3 Comparison of IR spectra of C-3 and C-4

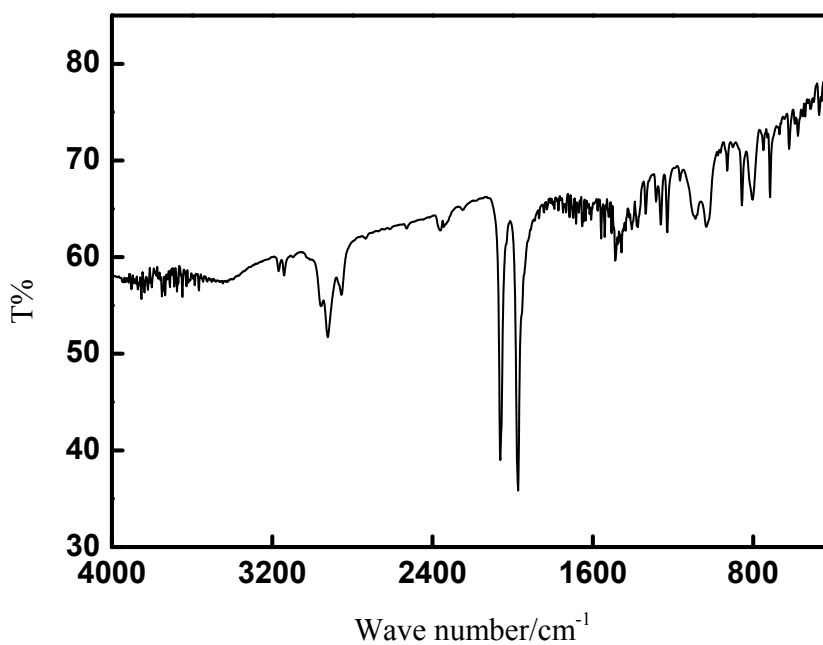

Fig.S4 IR spectra (NHC)Ir(CO)<sub>2</sub>Cl

## 8. XRD spectra of C-3 and C-4

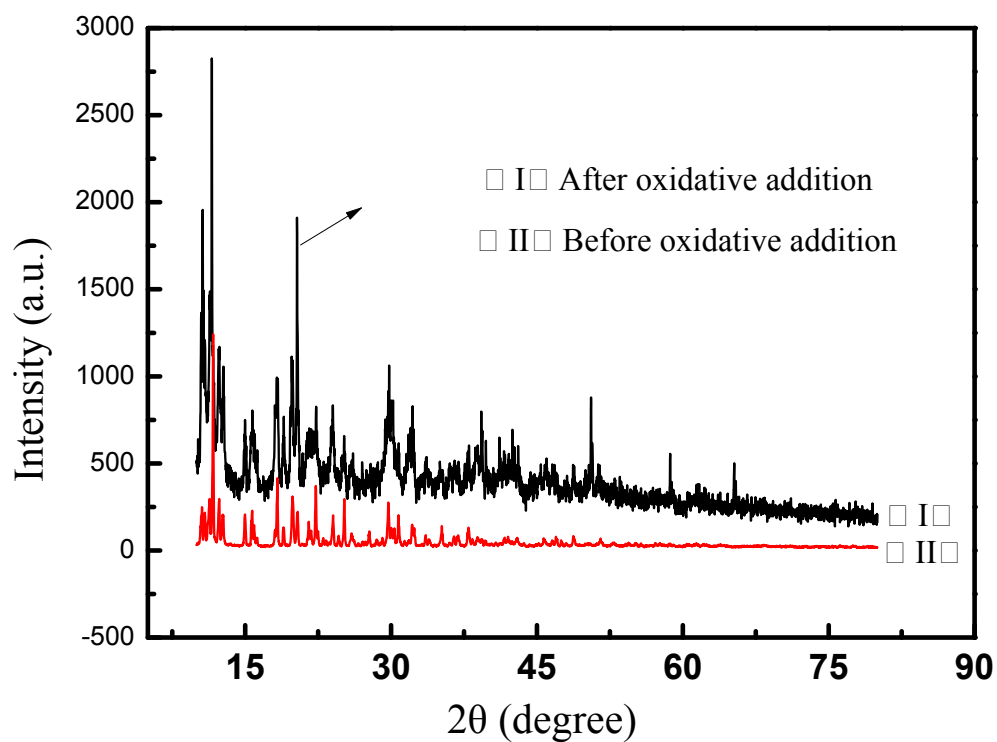

Fig.S5 Comparison of XRD spectra of C-3 and C-4

## 9. Crystal data for C-2

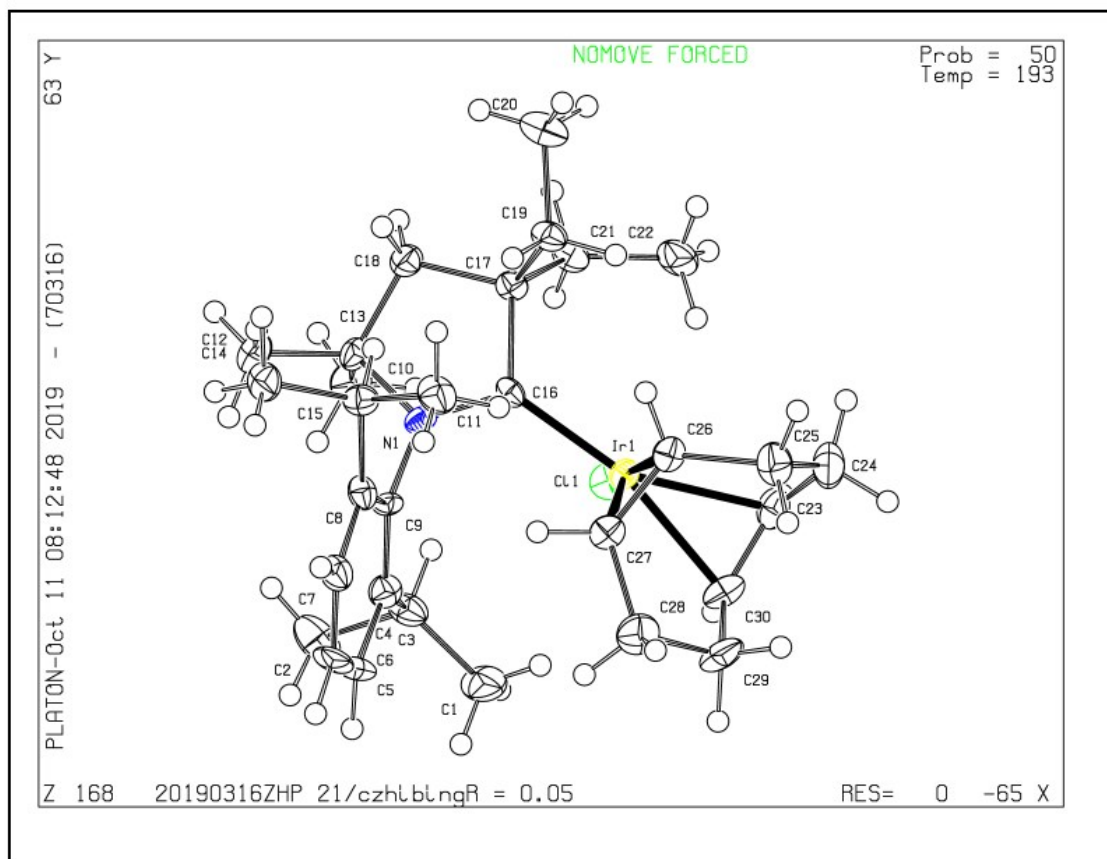

Table S3. Crystal data and structure refinement for CAAC-IrCl(COD) complex.

|                                   |                                                     |                 |
|-----------------------------------|-----------------------------------------------------|-----------------|
| Empirical formula                 | C <sub>30</sub> H <sub>47</sub> Ir Cl N             |                 |
| Molecular formula                 | C <sub>30</sub> H <sub>47</sub> Ir Cl N             |                 |
| Formula weight                    | 649.33                                              |                 |
| Temperature                       | 193.0 K                                             |                 |
| Wavelength                        | 1.34139 Å                                           |                 |
| Crystal system                    | Monoclinic                                          |                 |
| Space group                       | P 2 <sub>1</sub> /c                                 |                 |
| Unit cell dimensions              | a = 10.1037(6) Å                                    | ∠ = 90°.        |
|                                   | b = 11.6662(7) Å                                    | ∠ = 97.789(2)°. |
|                                   | c = 23.6230(15) Å                                   | ∠ = 90°.        |
| Volume                            | 2758.3(3) Å <sup>3</sup>                            |                 |
| Z                                 | 4                                                   |                 |
| Density (calculated)              | 1.563 g/cm <sup>3</sup>                             |                 |
| Absorption coefficient            | 6.882 mm <sup>-1</sup>                              |                 |
| F(000)                            | 1312.0                                              |                 |
| Crystal description               | Block                                               |                 |
| Theta range for data collection   | 3.29-53.94°                                         |                 |
| Index ranges                      | -10 ≤ h ≤ 12, -13 ≤ k ≤ 13, -28 ≤ l ≤ 28            |                 |
| Reflections collected             | 16260                                               |                 |
| Independent reflections           | 4734 [R(int) = 0.0631, R <sub>sigma</sub> = 0.0573] |                 |
| Refinement method                 | Full-matrix least-squares on F <sup>2</sup>         |                 |
| Data / restraints / parameters    | 4734 / 0 / 306                                      |                 |
| Goodness-of-fit on F <sup>2</sup> | 1.146                                               |                 |
| Final R indexes [I > 2σ(I)]       | R1 = 0.0461 wR2 = 0.1211                            |                 |
| R indexes (all data)              | R1 = 0.0487, wR2 = 0.1231                           |                 |
| Largest diff. peak and hole       | 0.74/-1.33 e.Å <sup>-3</sup>                        |                 |

Table S4. Atomic coordinates ( $\times 10^4$ ) and equivalent isotropic displacement parameters ( $\text{Å}^2 \times 10^3$ ) for CAAC-IrCl(COD) complex. U(eq) is defined as one third of the trace of the orthogonalized  $U^{ij}$  tensor.

| Atom  | x          | y          | z         | U(eq)     |
|-------|------------|------------|-----------|-----------|
| Cl(1) | -158.0(15) | 2806.1(14) | 6023.9(7) | 26.3(3)   |
| Ir(1) | 1926.5(2)  | 3774.5(2)  | 6274.3(2) | 17.57(13) |
| N(1)  | 3147(5)    | 1430(4)    | 6358(2)   | 18.6(11)  |

|       |         |         |         |          |
|-------|---------|---------|---------|----------|
| C(1)  | 1191(8) | 2371(8) | 4757(3) | 43(2)    |
| C(2)  | 1664(8) | 251(7)  | 4779(3) | 40.9(19) |
| C(3)  | 1834(7) | 1391(6) | 5118(3) | 27.5(15) |
| C(4)  | 3307(6) | 1599(6) | 5318(3) | 23.3(14) |
| C(5)  | 4129(7) | 1792(6) | 4893(3) | 28.2(15) |
| C(6)  | 5481(7) | 1984(6) | 5025(3) | 28.3(15) |
| C(7)  | 6063(7) | 1959(6) | 5587(3) | 25.3(14) |
| C(8)  | 5307(6) | 1741(5) | 6030(3) | 20.1(13) |
| C(9)  | 3921(6) | 1579(5) | 5883(2) | 15.9(12) |
| C(10) | 6046(6) | 1698(6) | 6631(3) | 22.5(13) |
| C(11) | 6605(7) | 2873(6) | 6838(3) | 30.5(15) |
| C(12) | 7196(6) | 831(6)  | 6679(3) | 28.7(15) |
| C(13) | 2909(6) | 262(5)  | 6609(3) | 20.2(13) |
| C(14) | 4012(7) | -606(6) | 6548(3) | 30.4(15) |
| C(15) | 1570(7) | -197(6) | 6324(3) | 30.8(15) |
| C(16) | 2605(5) | 2292(5) | 6620(2) | 16.7(12) |
| C(17) | 2382(6) | 1871(5) | 7221(3) | 18.5(12) |
| C(18) | 2831(7) | 601(5)  | 7232(3) | 24.2(14) |
| C(19) | 3347(6) | 2559(6) | 7657(3) | 23.3(14) |
| C(20) | 3384(7) | 2153(7) | 8273(3) | 35.6(17) |
| C(21) | 942(6)  | 1986(6) | 7366(3) | 24.2(14) |
| C(22) | 485(7)  | 3197(7) | 7490(3) | 33.8(17) |
| C(23) | 827(7)  | 5389(6) | 6223(3) | 28.4(15) |
| C(24) | 1566(8) | 6243(6) | 6630(4) | 37.2(18) |
| C(25) | 3077(8) | 6118(6) | 6683(4) | 33.0(17) |
| C(26) | 3515(6) | 4889(5) | 6603(3) | 21.1(13) |
| C(27) | 3732(6) | 4432(5) | 6067(3) | 21.8(13) |
| C(28) | 3541(8) | 5093(6) | 5508(3) | 36.2(17) |
| C(29) | 2209(7) | 5731(6) | 5408(3) | 34.3(17) |
| C(30) | 1130(7) | 5142(6) | 5684(3) | 28.1(15) |

Table S5. Bond lengths [ $\text{\AA}$ ] for CAAC-IrCl(COD) complex.

| Atom | Atom  | Length/ $\text{\AA}$ |
|------|-------|----------------------|
| C(1) | C(3)  | 1.519(10)            |
| C(2) | C(3)  | 1.549(10)            |
| C(3) | C(4)  | 1.518(9)             |
| C(4) | C(9)  | 1.394(8)             |
| C(4) | C(5)  | 1.407(9)             |
| C(5) | C(6)  | 1.378(10)            |
| C(6) | C(7)  | 1.379(9)             |
| C(7) | C(8)  | 1.399(9)             |
| C(8) | C(9)  | 1.409(8)             |
| C(8) | C(10) | 1.513(8)             |
| C(9) | N(1)  | 1.461(7)             |

|       |       |            |
|-------|-------|------------|
| C(10) | C(12) | 1.532(9)   |
| C(10) | C(11) | 1.538(9)   |
| C(13) | N(1)  | 1.519(7)   |
| C(13) | C(14) | 1.527(9)   |
| C(13) | C(15) | 1.525(9)   |
| C(13) | C(18) | 1.536(9)   |
| C(16) | N(1)  | 1.337(8)   |
| C(16) | C(17) | 1.545(8)   |
| C(16) | Ir(1) | 1.995(6)   |
| C(17) | C(19) | 1.544(8)   |
| C(17) | C(21) | 1.545(8)   |
| C(17) | C(18) | 1.549(9)   |
| C(19) | C(20) | 1.527(9)   |
| C(21) | C(22) | 1.527(10)  |
| C(23) | C(30) | 1.380(10)  |
| C(23) | C(24) | 1.510(10)  |
| C(23) | Ir(1) | 2.181(6)   |
| C(24) | C(25) | 1.522(11)  |
| C(25) | C(26) | 1.519(9)   |
| C(26) | C(27) | 1.418(9)   |
| C(26) | Ir(1) | 2.129(6)   |
| C(27) | C(28) | 1.519(9)   |
| C(27) | Ir(1) | 2.097(6)   |
| C(28) | C(29) | 1.528(10)  |
| C(29) | C(30) | 1.510(9)   |
| C(30) | Ir(1) | 2.199(6)   |
| Cl(1) | Ir(1) | 2.3925(15) |

Table S6. Bond angles [°] for CAAC-IrCl(COD) complex.

| Atom | Atom | Atom  | Angle/°  |
|------|------|-------|----------|
| C(4) | C(3) | C(1)  | 112.4(6) |
| C(4) | C(3) | C(2)  | 109.5(6) |
| C(1) | C(3) | C(2)  | 110.3(6) |
| C(9) | C(4) | C(5)  | 117.3(6) |
| C(9) | C(4) | C(3)  | 125.9(6) |
| C(5) | C(4) | C(3)  | 116.8(6) |
| C(6) | C(5) | C(4)  | 121.8(6) |
| C(5) | C(6) | C(7)  | 119.7(6) |
| C(6) | C(7) | C(8)  | 121.3(6) |
| C(7) | C(8) | C(9)  | 117.8(6) |
| C(7) | C(8) | C(10) | 117.2(5) |
| C(9) | C(8) | C(10) | 125.0(5) |
| C(4) | C(9) | C(8)  | 122.1(6) |
| C(4) | C(9) | N(1)  | 121.4(5) |

---

|       |       |       |          |
|-------|-------|-------|----------|
| C(8)  | C(9)  | N(1)  | 116.5(5) |
| C(8)  | C(10) | C(12) | 111.4(5) |
| C(8)  | C(10) | C(11) | 112.5(5) |
| C(12) | C(10) | C(11) | 108.8(5) |
| N(1)  | C(13) | C(14) | 113.7(5) |
| N(1)  | C(13) | C(15) | 108.7(5) |
| C(14) | C(13) | C(15) | 109.9(5) |
| N(1)  | C(13) | C(18) | 100.1(5) |
| C(14) | C(13) | C(18) | 113.2(5) |
| C(15) | C(13) | C(18) | 110.8(5) |
| N(1)  | C(16) | C(17) | 107.8(5) |
| N(1)  | C(16) | Ir(1) | 127.0(4) |
| C(17) | C(16) | Ir(1) | 124.6(4) |
| C(16) | C(17) | C(19) | 106.8(5) |
| C(16) | C(17) | C(21) | 115.7(5) |
| C(19) | C(17) | C(21) | 109.6(5) |
| C(16) | C(17) | C(18) | 104.0(5) |
| C(19) | C(17) | C(18) | 109.2(5) |
| C(21) | C(17) | C(18) | 111.2(5) |
| C(13) | C(18) | C(17) | 106.4(5) |
| C(20) | C(19) | C(17) | 114.0(5) |
| C(22) | C(21) | C(17) | 116.2(5) |
| C30   | C(23) | C(24) | 125.0(7) |
| C30   | C(23) | Ir(1) | 72.3(4)  |
| C(24) | C(23) | Ir(1) | 109.3(4) |
| C(23) | C(24) | C(25) | 113.1(6) |
| C(26) | C(25) | C(24) | 112.7(6) |
| C(27) | C(26) | C(25) | 123.3(6) |
| C(27) | C(26) | Ir(1) | 69.2(3)  |
| C(25) | C(26) | Ir(1) | 113.8(5) |
| C(26) | C(27) | C(28) | 124.7(6) |
| C(26) | C(27) | Ir(1) | 71.6(3)  |
| C(28) | C(27) | Ir(1) | 112.1(4) |
| C(27) | C(28) | C(29) | 112.8(6) |
| C(30) | C(29) | C(28) | 112.6(6) |
| C(23) | C(30) | C(29) | 124.5(7) |
| C(23) | C(30) | Ir(1) | 71.0(4)  |
| C(29) | C(30) | Ir(1) | 112.3(4) |
| C(16) | Ir(1) | C(27) | 98.7(2)  |
| C(16) | Ir(1) | C(26) | 100.4(2) |
| C(27) | Ir(1) | C(26) | 39.2(2)  |
| C(16) | Ir(1) | C(23) | 156.3(2) |
| C(27) | Ir(1) | C(23) | 97.1(3)  |
| C(26) | Ir(1) | C(23) | 81.1(2)  |

---

|       |       |       |            |
|-------|-------|-------|------------|
| C(16) | Ir(1) | C(30) | 164.8(3)   |
| C(27) | Ir(1) | C(30) | 80.9(3)    |
| C(26) | Ir(1) | C(30) | 88.9(2)    |
| C(23) | Ir(1) | C(30) | 36.7(3)    |
| C(16) | Ir(1) | Cl(1) | 86.21(17)  |
| C(27) | Ir(1) | Cl(1) | 151.59(18) |
| C(26) | Ir(1) | Cl(1) | 166.76(17) |
| C(23) | Ir(1) | Cl(1) | 88.25(19)  |
| C(30) | Ir(1) | Cl(1) | 87.21(18)  |
| C(16) | N(1)  | C(9)  | 124.2(5)   |
| C(16) | N(1)  | C(13) | 113.4(5)   |
| C(9)  | N(1)  | C(13) | 122.4(5)   |

Table S7. Anisotropic displacement parameters ( $\text{\AA}^2 \times 10^3$ ) for CAAC-IrCl(COD)

complex. The anisotropic displacement factor exponent takes the form:  $-2 \square^2 [ h^2$

$a^*2U_{11} + \dots + 2 h k a^* b^* U_{12} ]$

| Atom  | U11   | U22   | U33   | U23    | U13   | U12    |
|-------|-------|-------|-------|--------|-------|--------|
| C(1)  | 38(4) | 63(5) | 27(4) | 9(4)   | 0(3)  | 22(4)  |
| C(2)  | 32(4) | 52(5) | 38(4) | -24(4) | 2(3)  | -11(4) |
| C(3)  | 23(3) | 40(4) | 19(3) | -4(3)  | 0(3)  | 1(3)   |
| C(4)  | 24(3) | 21(3) | 24(3) | 0(3)   | 2(3)  | -2(3)  |
| C(5)  | 37(4) | 37(4) | 12(3) | 2(3)   | 7(3)  | 2(3)   |
| C(6)  | 33(4) | 38(4) | 17(3) | 1(3)   | 17(3) | -1(3)  |
| C(7)  | 23(3) | 27(3) | 27(3) | -2(3)  | 6(3)  | 3(3)   |
| C(8)  | 18(3) | 19(3) | 22(3) | -6(3)  | 0(2)  | -1(2)  |
| C(9)  | 19(3) | 16(3) | 13(3) | 4(2)   | 4(2)  | -3(2)  |
| C(10) | 20(3) | 27(3) | 21(3) | 2(3)   | 3(2)  | -1(3)  |
| C(11) | 27(4) | 36(4) | 26(3) | -8(3)  | -4(3) | 1(3)   |
| C(12) | 21(3) | 35(4) | 30(4) | -2(3)  | 0(3)  | 10(3)  |
| C(13) | 24(3) | 13(3) | 24(3) | 1(2)   | 2(3)  | -1(2)  |
| C(14) | 32(4) | 21(3) | 37(4) | 7(3)   | 4(3)  | 2(3)   |
| C(15) | 31(4) | 24(3) | 37(4) | 0(3)   | 3(3)  | -13(3) |
| C(16) | 11(3) | 22(3) | 17(3) | -4(2)  | 4(2)  | 0(2)   |
| C(17) | 15(3) | 22(3) | 20(3) | 2(3)   | 7(2)  | -2(2)  |
| C(18) | 30(4) | 20(3) | 22(3) | 1(3)   | 1(3)  | 0(3)   |
| C(19) | 22(3) | 30(3) | 17(3) | -2(3)  | 1(2)  | 0(3)   |
| C(20) | 34(4) | 51(5) | 22(3) | -5(3)  | 6(3)  | -7(3)  |

---

|       |           |           |           |        |          |         |
|-------|-----------|-----------|-----------|--------|----------|---------|
| C(21) | 21(3)     | 30(4)     | 23(3)     | -1(3)  | 8(3)     | -3(3)   |
| C(22) | 30(4)     | 45(4)     | 29(4)     | 1(3)   | 15(3)    | 5(3)    |
| C(23) | 19(3)     | 28(4)     | 38(4)     | 3(3)   | 3(3)     | 7(3)    |
| C(24) | 42(5)     | 26(4)     | 45(5)     | -3(3)  | 9(4)     | 9(3)    |
| C(25) | 34(4)     | 27(4)     | 39(4)     | -4(3)  | 8(3)     | 0(3)    |
| C(26) | 19(3)     | 17(3)     | 28(3)     | 1(3)   | 4(3)     | -6(2)   |
| C(27) | 17(3)     | 22(3)     | 27(3)     | 3(3)   | 5(2)     | -6(3)   |
| C(28) | 39(4)     | 32(4)     | 41(4)     | 7(3)   | 14(3)    | -5(3)   |
| C(29) | 36(4)     | 33(4)     | 34(4)     | 20(3)  | 6(3)     | 2(3)    |
| C(30) | 26(3)     | 29(4)     | 28(3)     | 11(3)  | -4(3)    | -2(3)   |
| Cl(1) | 18.5(7)   | 30.3(8)   | 29.3(8)   | 1.3(7) | 0.8(6)   | -4.6(6) |
| Ir(1) | 16.02(19) | 17.22(18) | 19.28(18) | 1.5(1) | 1.70(11) | 0.18(9) |
| N(1)  | 22(3)     | 16(2)     | 18(3)     | 4(2)   | 1(2)     | -3(2)   |

---



Table S8. Hydrogen coordinates ( $\text{\AA}\times 10^4$ ) and isotropic displacement parameters $(\text{\AA}^2\times 10^3)$  for CAAC-IrCl(COD) complex.

| Atom   | x       | y        | z       | U(eq) |
|--------|---------|----------|---------|-------|
| H(1A)  | 1335.14 | 3090.71  | 4970.46 | 65    |
| H(1B)  | 230.33  | 2229.07  | 4664.18 | 65    |
| H(1C)  | 1593.24 | 2426.68  | 4402.82 | 65    |
| H(2A)  | 2182.74 | 283.48   | 4457.99 | 61    |
| H(2B)  | 717.7   | 136.26   | 4634.26 | 61    |
| H(2C)  | 1982.84 | -386.27  | 5031.51 | 61    |
| H(3)   | 1366.5  | 1313.82  | 5462.69 | 33    |
| H(5)   | 3741.48 | 1790.07  | 4502.99 | 34    |
| H(6)   | 6010.18 | 2133.47  | 4729.78 | 34    |
| H(7)   | 6995.43 | 2093.15  | 5676.55 | 30    |
| H(10)  | 5402.54 | 1444.35  | 6891.91 | 27    |
| H(11A) | 7283.95 | 3116.39  | 6603.31 | 46    |
| H(11B) | 7008.8  | 2816.36  | 7238.04 | 46    |
| H(11C) | 5878.99 | 3436.4   | 6803.83 | 46    |
| H(12A) | 6867.53 | 99.12    | 6511.02 | 43    |
| H(12B) | 7547.72 | 716.76   | 7082.25 | 43    |
| H(12C) | 7907.05 | 1122.55  | 6474.12 | 43    |
| H(14A) | 4113.5  | -690.05  | 6143.3  | 46    |
| H(14B) | 3776.2  | -1347.73 | 6700.83 | 46    |
| H(14C) | 4855.23 | -335.58  | 6760.32 | 46    |
| H(15A) | 883.2   | 394.36   | 6331.37 | 46    |
| H(15B) | 1324.36 | -876.22  | 6530.88 | 46    |
| H(15C) | 1640.63 | -403.86  | 5927.48 | 46    |
| H(18A) | 3714.06 | 511.91   | 7466.52 | 29    |
| H(18B) | 2177.25 | 111.48   | 7395.65 | 29    |
| H(19A) | 4259.08 | 2505.58  | 7549.26 | 28    |
| H(19B) | 3080.19 | 3375.89  | 7634.14 | 28    |
| H(20A) | 2517.72 | 2299.67  | 8401.5  | 53    |
| H(20B) | 4084.21 | 2568.18  | 8518.68 | 53    |
| H(20C) | 3575.22 | 1328.87  | 8294.68 | 53    |
| H(21A) | 321.93  | 1673.24  | 7041.9  | 29    |
| H(21B) | 859.84  | 1501.63  | 7703.15 | 29    |
| H(22A) | 941.52  | 3450.44  | 7860.87 | 51    |
| H(22B) | -482.61 | 3198.08  | 7496.9  | 51    |
| H(22C) | 702.27  | 3718.57  | 7190.41 | 51    |
| H(23A) | -97.64  | 5103.83  | 6235.31 | 34    |
| H(24A) | 1282.45 | 6144.86  | 7012.04 | 45    |
| H(24B) | 1316.67 | 7028.11  | 6496.4  | 45    |
| H(25A) | 3418.37 | 6609.35  | 6393.56 | 40    |

---

|        |         |         |         |    |
|--------|---------|---------|---------|----|
| H(25B) | 3478.21 | 6390.02 | 7065.12 | 40 |
| H(26A) | 4063.13 | 4592.54 | 6972.3  | 25 |
| H(27A) | 4343.93 | 3762    | 6007.59 | 26 |
| H(28A) | 3589.93 | 4551.63 | 5188.4  | 43 |
| H(28B) | 4278.86 | 5651.5  | 5508.34 | 43 |
| H(29A) | 2336.56 | 6517.4  | 5562.84 | 41 |
| H(29B) | 1917.59 | 5792.93 | 4991.49 | 41 |
| H(30A) | 312.01  | 4754.86 | 5478.12 | 34 |

---

## 10. Crystal data for C-3

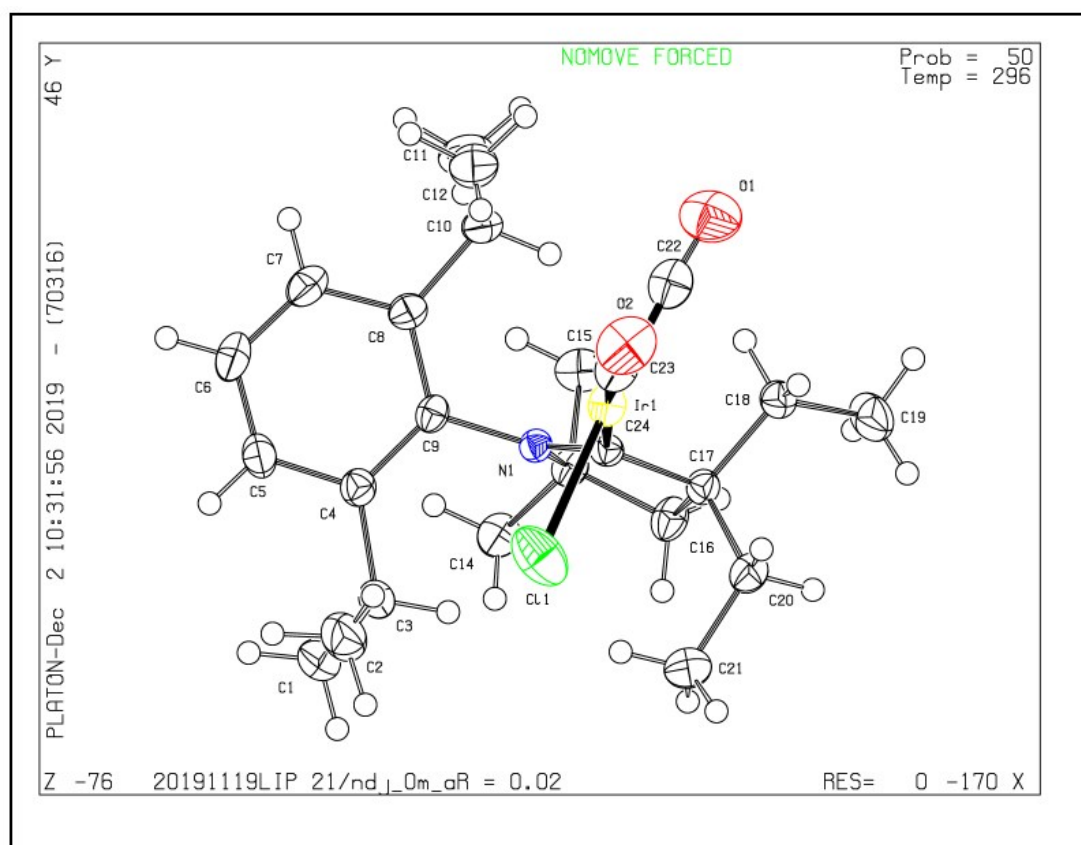

Table S9. Crystal data and structure refinement for CAAC-IrCl(COD) complex.

|                             |                                                        |                   |
|-----------------------------|--------------------------------------------------------|-------------------|
| Empirical formula           | C <sub>24</sub> H <sub>35</sub> Ir Cl N O <sub>2</sub> |                   |
| Molecular formula           | C <sub>24</sub> H <sub>35</sub> Ir Cl N O <sub>2</sub> |                   |
| Formula weight              | 597.18                                                 |                   |
| Temperature                 | 296.0 K                                                |                   |
| Wavelength                  | 0.71073 Å                                              |                   |
| Crystal system              | Monoclinic                                             |                   |
| Space group                 | P 2 <sub>1</sub> /n                                    |                   |
| Unit cell dimensions        | a = 9.4294(3) Å                                        | ∠ = 90°.          |
|                             | b = 15.2306(4) Å                                       | ∠ = 94.9040(10)°. |
|                             | c = 16.4958(5) Å                                       | ∠ = 90°.          |
| Volume                      | 2360.38(12) Å <sup>3</sup>                             |                   |
| Z                           | 4                                                      |                   |
| Density (calculated)        | 1.680 g/cm <sup>3</sup>                                |                   |
| Crstal size/mm <sup>3</sup> | 0.120*0.110*0.090                                      |                   |
| F(000)                      | 1184.0                                                 |                   |
| Crystal description         | Block                                                  |                   |

|                                   |                                                              |
|-----------------------------------|--------------------------------------------------------------|
| Theta range for data collection   | 5.094-56.586°                                                |
| Index ranges                      | -12<=h<=12, -20<=k<=20, -20<=l<=22                           |
| Reflections collected             | 23267                                                        |
| Independent reflections           | 5835 [R <sub>int</sub> = 0.0264, R <sub>sigma</sub> =0.0243] |
| Refinement method                 | Full-matrix least-squares on F <sup>2</sup>                  |
| Data / restraints / parameters    | 5835/ 0/270                                                  |
| Goodness-of-fit on F <sup>2</sup> | 0.969                                                        |
| Final R indexes [I>2sigma(I)]     | R1 = 0.0198 , wR2 =0.0469                                    |
| R indexes (all data)              | R1 = 0.0245, wR2 =0.0490                                     |
| Largest diff. peak and hole       | 0.86/-0.64Å <sup>-3</sup>                                    |

Table S10. Atomic coordinates ( $\times 10^4$ ) and equivalent isotropic displacement parameters ( $\text{\AA}^2 \times 10^3$ ) for CAAC-IrCl(CO)<sub>2</sub> complex. U(eq) is defined as one third of the trace of the orthogonalized U<sup>ij</sup> tensor.

| Atom | x          | y          | z          | U(eq)   |
|------|------------|------------|------------|---------|
| C1   | 210(3)     | 6262.1(19) | 4758(2)    | 45.0(7) |
| C2   | 2234(4)    | 6591(2)    | 3937.4(19) | 48.5(8) |
| C3   | 1742(3)    | 6629.1(17) | 4798.4(17) | 32.6(6) |
| C4   | 2762(2)    | 6117.4(15) | 5388.5(16) | 25.4(5) |
| C5   | 2882(3)    | 5219.1(16) | 5244.1(17) | 32.0(5) |
| C6   | 3787(3)    | 4689.0(16) | 5721.8(19) | 35.5(6) |
| C7   | 4641(3)    | 5060.6(16) | 6349.0(18) | 33.0(6) |
| C8   | 4602(2)    | 5956.6(15) | 6526.0(16) | 25.9(5) |
| C9   | 3624(2)    | 6479.3(14) | 6044.4(15) | 22.4(4) |
| C10  | 5677(3)    | 6294.1(17) | 7190.9(17) | 32.0(5) |
| C11  | 5530(4)    | 5845(2)    | 8014.8(19) | 51.2(8) |
| C12  | 7190(3)    | 6142(2)    | 6947(2)    | 47.5(8) |
| C13  | 2268(2)    | 7636.7(15) | 6832.3(15) | 24.3(5) |
| C14  | 845(2)     | 7205.6(17) | 6588.8(18) | 32.6(6) |
| C15  | 2768(3)    | 7356.9(19) | 7693.9(17) | 36.2(6) |
| C16  | 2201(2)    | 8632.4(15) | 6728.1(18) | 29.9(5) |
| C17  | 3605(2)    | 8917.1(14) | 6411.0(15) | 22.8(4) |
| C18  | 4698(2)    | 9255.2(16) | 7093.8(16) | 28.0(5) |
| C19  | 4186(3)    | 10003(2)   | 7604(2)    | 46.2(8) |
| C20  | 3411(3)    | 9627.7(16) | 5746.7(17) | 33.7(6) |
| C21  | 2330(4)    | 9435(2)    | 5034(2)    | 49.5(8) |
| C22  | 7182(3)    | 8196.7(17) | 6474(2)    | 35.0(6) |
| C23  | 7763(3)    | 8205.3(17) | 4944.2(19) | 35.7(6) |
| Cl1  | 4849.9(10) | 8078.7(6)  | 4178.1(5)  | 55.1(2) |

|     |            |            |            |          |
|-----|------------|------------|------------|----------|
| Ir1 | 6063.0(2)  | 8093.9(2)  | 5474.7(2)  | 26.71(4) |
| N1  | 3414.1(18) | 7404.0(12) | 6259.6(12) | 20.5(4)  |
| C24 | 4191(2)    | 8069.6(14) | 6064.4(14) | 21.2(4)  |
| O1  | 7854(2)    | 8296.0(17) | 7020.6(17) | 57.1(6)  |
| O2  | 8776(2)    | 8301.4(16) | 4641.9(15) | 51.9(6)  |

Table S11. Bond lengths [ $\text{\AA}$ ] for CAAC-IrCl(CO)<sub>2</sub> complex.

| Atom | Atom | Length/ $\text{\AA}$ |
|------|------|----------------------|
| C1   | C3   | 1.545(4)             |
| C2   | C3   | 1.532(4)             |
| C3   | C4   | 1.523(3)             |
| C4   | C5   | 1.395(3)             |
| C4   | C9   | 1.409(3)             |
| C5   | C6   | 1.374(4)             |
| C6   | C7   | 1.377(4)             |
| C7   | C8   | 1.397(3)             |
| C8   | C9   | 1.411(3)             |
| C8   | C10  | 1.518(3)             |
| C9   | N1   | 1.470(3)             |
| C10  | C12  | 1.532(4)             |
| C10  | C11  | 1.538(4)             |
| C13  | C14  | 1.517(3)             |
| C13  | C15  | 1.520(4)             |
| C13  | C16  | 1.527(3)             |
| C13  | N1   | 1.537(3)             |
| C16  | C17  | 1.528(3)             |
| C17  | C24  | 1.533(3)             |
| C17  | C20  | 1.540(3)             |
| C17  | C18  | 1.548(3)             |
| C18  | C19  | 1.519(3)             |
| C20  | C21  | 1.517(4)             |
| C22  | O1   | 1.068(4)             |
| C22  | Ir1  | 1.886(3)             |
| C23  | O2   | 1.124(3)             |
| C23  | Ir1  | 1.898(3)             |
| Cl1  | Ir1  | 2.3378(9)            |
| Ir1  | C24  | 2.088(2)             |
| N1   | C24  | 1.307(3)             |

Table S12. Bond angles [°] for CAAC-IrCl(COD) complex.

| Atom | Atom | Atom | Angle/°    |
|------|------|------|------------|
| C4   | C3   | C2   | 110.4(2)   |
| C4   | C3   | C1   | 112.3(2)   |
| C2   | C3   | C1   | 107.6(2)   |
| C5   | C4   | C9   | 117.7(2)   |
| C5   | C4   | C3   | 116.7(2)   |
| C9   | C4   | C3   | 125.6(2)   |
| C6   | C5   | C4   | 122.3(2)   |
| C5   | C6   | C7   | 119.0(2)   |
| C6   | C7   | C8   | 122.3(2)   |
| C7   | C8   | C9   | 117.5(2)   |
| C7   | C8   | C10  | 117.0(2)   |
| C9   | C8   | C10  | 125.4(2)   |
| C8   | C9   | C4   | 121.2(2)   |
| C8   | C9   | N1   | 120.0(2)   |
| C4   | C9   | N1   | 118.67(19) |
| C8   | C10  | C12  | 109.8(2)   |
| C8   | C10  | C11  | 112.5(2)   |
| C12  | C10  | C11  | 108.7(2)   |
| C14  | C13  | C15  | 108.9(2)   |
| C14  | C13  | C16  | 111.91(19) |
| C15  | C13  | C16  | 113.0(2)   |
| C14  | C13  | N1   | 113.0(2)   |
| C15  | C13  | N1   | 109.38(18) |
| C16  | C13  | N1   | 100.62(17) |
| C17  | C16  | C13  | 106.98(18) |
| C16  | C17  | C24  | 103.82(18) |
| C16  | C17  | C20  | 112.90(19) |
| C24  | C17  | C20  | 110.6(2)   |
| C16  | C17  | C18  | 112.8(2)   |
| C24  | C17  | C18  | 108.21(18) |
| C20  | C17  | C18  | 108.38(19) |
| C19  | C18  | C17  | 115.4(2)   |
| C21  | C20  | C17  | 116.6(2)   |
| O1   | C22  | Ir1  | 175.7(3)   |
| O2   | C23  | Ir1  | 177.4(3)   |
| C22  | Ir1  | C23  | 87.94(12)  |
| C22  | Ir1  | C24  | 91.52(10)  |
| C23  | Ir1  | C24  | 175.88(10) |
| C22  | Ir1  | C11  | 173.60(8)  |
| C23  | Ir1  | C11  | 86.87(10)  |
| C24  | Ir1  | C11  | 93.38(7)   |

|     |     |     |            |
|-----|-----|-----|------------|
| C24 | N1  | C9  | 126.44(19) |
| C24 | N1  | C13 | 114.26(18) |
| C9  | N1  | C13 | 119.06(17) |
| N1  | C24 | C17 | 109.5(2)   |
| N1  | C24 | Ir1 | 129.98(16) |
| C17 | C24 | Ir1 | 120.30(15) |

Table S13. Anisotropic displacement parameters ( $\text{\AA}^2 \times 10^3$ ) for CAAC-IrCl(CO)<sub>2</sub>

complex. The anisotropic displacement factor exponent takes the form:  $-2\pi^2 [h^2$

$a^*2U_{11} + \dots + 2hk a^* b^* U_{12}]$

| Atom | U11      | U22      | U33      | U23       | U13       | U12      |
|------|----------|----------|----------|-----------|-----------|----------|
| C1   | 35.8(14) | 38.7(15) | 57(2)    | -6.9(14)  | -14.5(13) | -0.2(11) |
| C2   | 65(2)    | 42.8(16) | 35.3(18) | 0.9(13)   | -8.1(15)  | -8.4(15) |
| C3   | 36.9(13) | 27.1(12) | 32.2(15) | -2.3(10)  | -7.5(11)  | -2.3(10) |
| C4   | 24.2(10) | 23.5(11) | 28.7(13) | 0.2(9)    | 2.6(9)    | -1.8(8)  |
| C5   | 32.3(12) | 26.9(12) | 36.6(15) | -8.6(10)  | 0.9(11)   | -3.8(9)  |
| C6   | 38.7(14) | 20.9(12) | 47.9(18) | -3.3(11)  | 9.3(12)   | 0.9(10)  |
| C7   | 30.9(12) | 26.3(12) | 42.2(16) | 4.1(11)   | 5.0(11)   | 6.4(9)   |
| C8   | 23.8(10) | 26.5(11) | 27.5(13) | 1.7(9)    | 3.1(9)    | 2.7(8)   |
| C9   | 22.1(10) | 19.4(10) | 26.4(13) | -0.2(9)   | 6.5(9)    | 0.4(8)   |
| C10  | 32.2(12) | 30.9(13) | 31.4(15) | -0.6(10)  | -5.3(10)  | 7.7(10)  |
| C11  | 66(2)    | 52.8(19) | 32.6(17) | 7.3(14)   | -7.0(14)  | 17.3(15) |
| C12  | 27.6(13) | 44.5(16) | 69(2)    | -6.3(15)  | -5.8(14)  | 8.3(11)  |
| C13  | 21.9(10) | 24.7(11) | 27.3(13) | -0.1(9)   | 7.0(9)    | 1.8(8)   |
| C14  | 23.2(11) | 32.7(12) | 42.9(16) | 2.2(11)   | 9.4(10)   | -1.7(9)  |
| C15  | 33.4(13) | 49.0(16) | 27.4(14) | 3.5(12)   | 9.7(11)   | 5.5(11)  |
| C16  | 26.4(11) | 24.4(11) | 40.3(16) | -2.0(10)  | 10.2(10)  | 2.1(9)   |
| C17  | 23.0(10) | 21.3(10) | 24.1(12) | -1.8(9)   | 2.5(9)    | 1.2(8)   |
| C18  | 27.0(11) | 27.4(11) | 29.2(13) | -4.0(10)  | 0.0(9)    | 1.8(9)   |
| C19  | 39.5(15) | 50.0(17) | 48.0(19) | -24.7(14) | -3.3(13)  | 9.8(12)  |
| C20  | 42.3(14) | 24.5(12) | 33.4(15) | 3.3(10)   | -2.0(11)  | 1.4(10)  |
| C21  | 63(2)    | 38.3(16) | 43.5(19) | 6.3(13)   | -16.6(15) | 4.1(13)  |
| C22  | 29.8(13) | 36.4(14) | 41.2(17) | -2.4(12)  | 17.7(12)  | 2.6(10)  |
| C23  | 37.1(14) | 33.0(14) | 38.8(16) | 2.5(11)   | 14.1(12)  | 0.3(10)  |
| Cl1  | 56.7(5)  | 74.6(6)  | 34.7(4)  | -6.7(4)   | 8.2(3)    | -21.1(4) |
| Ir1  | 27.00(5) | 26.46(6) | 28.00(6) | -0.66(4)  | 10.09(4)  | -1.96(3) |
| N1   | 19.7(8)  | 20.2(9)  | 21.7(10) | -0.7(7)   | 2.3(7)    | 1.0(6)   |
| C24  | 22.2(10) | 22.0(10) | 19.3(11) | 0.8(8)    | 0.6(8)    | -0.3(8)  |
| O1   | 39.8(12) | 76.1(16) | 56.0(17) | -6.0(13)  | 8.1(11)   | 13.3(11) |
| O2   | 41.6(12) | 59.4(14) | 58.6(16) | 8.8(11)   | 26.2(11)  | 2.9(9)   |

Table S14. Hydrogen coordinates ( $\text{\AA} \times 10^4$ ) and isotropic displacement parameters ( $\text{\AA}^2 \times 10^3$ ) for CAAC-IrCl(CO)<sub>2</sub> complex.

| Atom | x       | y        | z       | U(eq) |
|------|---------|----------|---------|-------|
| H1A  | -409.93 | 6631.9   | 4415.93 | 68    |
| H1B  | -107.91 | 6247.96  | 5295.51 | 68    |
| H1C  | 196.94  | 5678.34  | 4538.12 | 68    |
| H2A  | 3218.17 | 6755.61  | 3953.12 | 73    |
| H2B  | 1672.65 | 6987.96  | 3590.64 | 73    |
| H2C  | 2117.91 | 6004.07  | 3729.09 | 73    |
| H3   | 1729.3  | 7243.54  | 4974.03 | 39    |
| H5   | 2329.09 | 4970.48  | 4809.48 | 38    |
| H6   | 3823.21 | 4088.51  | 5623.2  | 43    |
| H7   | 5265.8  | 4702.44  | 6665.82 | 40    |
| H10  | 5531.26 | 6926.56  | 7254.37 | 38    |
| H11A | 4556.65 | 5875.08  | 8142.83 | 77    |
| H11B | 6126.63 | 6137.93  | 8431.12 | 77    |
| H11C | 5813.56 | 5241.24  | 7984.62 | 77    |
| H12A | 7373.81 | 5523.28  | 6924.7  | 71    |
| H12B | 7862.16 | 6410.66  | 7341.65 | 71    |
| H12C | 7281.97 | 6398.18  | 6422.33 | 71    |
| H14A | 180.41  | 7355.87  | 6976.15 | 49    |
| H14B | 963.18  | 6579.76  | 6577.45 | 49    |
| H14C | 490.28  | 7408.14  | 6058.72 | 49    |
| H15A | 3672.46 | 7623.11  | 7852.04 | 54    |
| H15B | 2862.1  | 6729.55  | 7714.98 | 54    |
| H15C | 2085.78 | 7541.41  | 8058.87 | 54    |
| H16A | 1407.33 | 8793.79  | 6343.99 | 36    |
| H16B | 2078.22 | 8914.13  | 7244.76 | 36    |
| H18A | 4973.56 | 8768.33  | 7452.42 | 34    |
| H18B | 5543.4  | 9448.13  | 6847.88 | 34    |
| H19A | 3946.47 | 10498.91 | 7260.45 | 69    |
| H19B | 4926.97 | 10163.5  | 8012.23 | 69    |
| H19C | 3360.87 | 9817.51  | 7861.21 | 69    |
| H20A | 3136.3  | 10169.53 | 5999.87 | 40    |
| H20B | 4325.78 | 9728.74  | 5535.56 | 40    |
| H21A | 2490.49 | 8856.74  | 4830.38 | 74    |
| H21B | 2429.19 | 9858.33  | 4611.2  | 74    |
| H21C | 1387.44 | 9469.75  | 5210.24 | 74    |

## 11. Theoretical calculation method



All the structures were fully optimized with DFT method (B3LYP). LANL2DZ basis set was used for Ir and I. For energy calculation: 6-311++G\*\* basis set was used for other atoms. For structure optimization: 6-31+G\* basis set was used for other atoms. The influence of solvent was investigated in condensed phase using the Polarizable Continuum Model (PCM) at B3LYP-D3(BJ)/6-311++G\*\* method. B3LYP-D3(BJ) is a DFT-D3 method including dispersion corrections.<sup>S1-S4</sup>

The computed stationary points have been characterized as minima or transition states by diagonalizing the Hessian matrix and analyzing the vibrational normal modes. In this way, the stationary points can be classified as minima if no imaginary frequencies are shown or as transition states if only one imaginary frequency is obtained. The particular nature of the transition states has been determined by analyzing the motion described by the eigenvector associated with the imaginary frequency. All calculations were performed with the Gaussian 09 suite of programs<sup>S5</sup>.

## 12. Cartesians coordinates of the optimized structures

C-2

|   |   |           |           |           |
|---|---|-----------|-----------|-----------|
| 6 | 0 | -0.514272 | -3.092141 | -2.187473 |
| 6 | 0 | -2.735258 | -2.291721 | -3.078908 |
| 6 | 0 | -1.593724 | -1.996222 | -2.081291 |
| 6 | 0 | -2.126903 | -1.856451 | -0.659015 |
| 6 | 0 | -2.677095 | -3.002348 | -0.062221 |
| 6 | 0 | -3.193534 | -2.984573 | 1.227503  |
| 6 | 0 | -3.186508 | -1.793695 | 1.946685  |
| 6 | 0 | -2.665525 | -0.611716 | 1.403629  |
| 6 | 0 | -2.110329 | -0.656825 | 0.092941  |
| 6 | 0 | -2.760709 | 0.651968  | 2.267463  |
| 6 | 0 | -1.853847 | 0.603450  | 3.515516  |
| 6 | 0 | -4.213737 | 0.927673  | 2.719786  |
| 6 | 0 | -2.387498 | 1.597234  | -1.204791 |
| 6 | 0 | -3.873558 | 1.577093  | -0.842158 |

|    |   |           |           |           |
|----|---|-----------|-----------|-----------|
| 6  | 0 | -2.246470 | 1.345023  | -2.720509 |
| 6  | 0 | -0.266419 | 0.964877  | -0.278831 |
| 6  | 0 | -0.204144 | 2.516177  | -0.471552 |
| 6  | 0 | -1.681625 | 2.894241  | -0.793203 |
| 6  | 0 | 0.209528  | 3.121542  | 0.904579  |
| 6  | 0 | 0.126582  | 4.653608  | 0.986700  |
| 6  | 0 | 0.746230  | 3.027891  | -1.599425 |
| 6  | 0 | 2.251745  | 3.061911  | -1.306629 |
| 6  | 0 | 3.560887  | -0.632779 | -0.100231 |
| 6  | 0 | 4.180779  | -0.008360 | 1.136338  |
| 6  | 0 | 3.253680  | -0.051323 | 2.374130  |
| 6  | 0 | 1.769509  | 0.021115  | 2.002482  |
| 6  | 0 | 0.953092  | -1.129138 | 1.760927  |
| 6  | 0 | 1.426420  | -2.572098 | 1.797624  |
| 6  | 0 | 2.753448  | -2.803195 | 1.039288  |
| 6  | 0 | 2.907287  | -1.865579 | -0.149521 |
| 17 | 0 | 1.470519  | -0.165696 | -2.561049 |
| 77 | 0 | 1.363783  | -0.187063 | -0.099895 |
| 7  | 0 | -1.542758 | 0.582818  | -0.434373 |
| 1  | 0 | 0.292106  | -2.912689 | -1.472311 |
| 1  | 0 | -0.075128 | -3.081632 | -3.191025 |
| 1  | 0 | -0.928800 | -4.092429 | -2.008371 |
| 1  | 0 | -3.171981 | -3.282475 | -2.901226 |
| 1  | 0 | -2.350389 | -2.277460 | -4.105933 |
| 1  | 0 | -3.549381 | -1.561019 | -3.010292 |
| 1  | 0 | -1.111093 | -1.061585 | -2.367095 |
| 1  | 0 | -2.692024 | -3.930576 | -0.625898 |
| 1  | 0 | -3.604496 | -3.889723 | 1.667917  |
| 1  | 0 | -3.599229 | -1.778504 | 2.951579  |
| 1  | 0 | -2.432487 | 1.503197  | 1.667215  |

|   |   |           |           |           |
|---|---|-----------|-----------|-----------|
| 1 | 0 | -2.098057 | -0.256565 | 4.150548  |
| 1 | 0 | -1.997063 | 1.511122  | 4.115360  |
| 1 | 0 | -0.794750 | 0.536739  | 3.256123  |
| 1 | 0 | -4.925560 | 0.880639  | 1.889750  |
| 1 | 0 | -4.282472 | 1.923268  | 3.175705  |
| 1 | 0 | -4.540881 | 0.202276  | 3.473718  |
| 1 | 0 | -4.320007 | 0.590920  | -1.007309 |
| 1 | 0 | -4.396821 | 2.290434  | -1.489438 |
| 1 | 0 | -4.057315 | 1.875201  | 0.190692  |
| 1 | 0 | -1.201438 | 1.239866  | -3.022433 |
| 1 | 0 | -2.682720 | 2.193098  | -3.262079 |
| 1 | 0 | -2.783791 | 0.445848  | -3.030530 |
| 1 | 0 | -2.172790 | 3.302465  | 0.098328  |
| 1 | 0 | -1.755515 | 3.652691  | -1.577894 |
| 1 | 0 | -0.433025 | 2.695058  | 1.686123  |
| 1 | 0 | 1.227905  | 2.799180  | 1.139054  |
| 1 | 0 | 0.800423  | 5.141551  | 0.274610  |
| 1 | 0 | 0.411039  | 4.988772  | 1.991566  |
| 1 | 0 | -0.886481 | 5.026372  | 0.793725  |
| 1 | 0 | 0.581449  | 2.428643  | -2.498255 |
| 1 | 0 | 0.423311  | 4.048786  | -1.843473 |
| 1 | 0 | 2.510840  | 3.806836  | -0.545169 |
| 1 | 0 | 2.794864  | 3.321477  | -2.223072 |
| 1 | 0 | 2.620065  | 2.087860  | -0.972209 |
| 1 | 0 | 3.906520  | -0.225955 | -1.049033 |
| 1 | 0 | 4.409666  | 1.037138  | 0.897959  |
| 1 | 0 | 5.146369  | -0.488712 | 1.363383  |
| 1 | 0 | 3.443432  | -0.955613 | 2.965097  |
| 1 | 0 | 3.499884  | 0.790294  | 3.032987  |
| 1 | 0 | 1.261257  | 0.894388  | 2.406197  |

|   |   |           |           |           |
|---|---|-----------|-----------|-----------|
| 1 | 0 | -0.102975 | -1.039219 | 1.998985  |
| 1 | 0 | 0.639066  | -3.183020 | 1.340517  |
| 1 | 0 | 1.514055  | -2.916914 | 2.841575  |
| 1 | 0 | 3.606798  | -2.688484 | 1.717369  |
| 1 | 0 | 2.790021  | -3.839607 | 0.682956  |
| 1 | 0 | 2.768567  | -2.304834 | -1.134640 |

C-3

|   |   |           |           |           |
|---|---|-----------|-----------|-----------|
| 6 | 0 | -1.974284 | -0.131257 | -3.307824 |
| 6 | 0 | -3.855028 | 1.366790  | -2.583666 |
| 6 | 0 | -2.546400 | 0.683605  | -2.125737 |
| 6 | 0 | -2.742724 | -0.159693 | -0.859729 |
| 6 | 0 | -3.759270 | -1.124337 | -0.885599 |
| 6 | 0 | -3.981976 | -1.980738 | 0.186402  |
| 6 | 0 | -3.164946 | -1.900117 | 1.308788  |
| 6 | 0 | -2.130559 | -0.958809 | 1.401656  |
| 6 | 0 | -1.944483 | -0.067448 | 0.312516  |
| 6 | 0 | -1.247424 | -1.004041 | 2.650710  |
| 6 | 0 | -0.457149 | -2.328739 | 2.728367  |
| 6 | 0 | -2.054326 | -0.811266 | 3.953240  |
| 6 | 0 | -1.297211 | 2.372690  | 0.890062  |
| 6 | 0 | -1.953522 | 2.298226  | 2.276717  |
| 6 | 0 | -2.256948 | 3.129105  | -0.040672 |
| 6 | 0 | 0.377225  | 0.778625  | 0.148864  |
| 6 | 0 | 1.076113  | 2.172115  | 0.171224  |
| 6 | 0 | 0.082977  | 3.049229  | 0.962684  |
| 6 | 0 | 2.467944  | 2.176207  | 0.859756  |
| 6 | 0 | 3.041740  | 3.539844  | 1.287891  |
| 6 | 0 | 1.161189  | 2.542687  | -1.350886 |
| 6 | 0 | 1.748622  | 3.908022  | -1.738675 |

|    |   |           |           |           |
|----|---|-----------|-----------|-----------|
| 17 | 0 | 2.859718  | -2.542701 | -1.372910 |
| 77 | 0 | 1.374124  | -0.874947 | -0.391332 |
| 7  | 0 | -0.920634 | 0.970649  | 0.400027  |
| 6  | 0 | -0.028934 | -1.877094 | -1.187460 |
| 8  | 0 | -0.768375 | -2.700850 | -1.516753 |
| 1  | 0 | -0.953240 | -0.469710 | -3.119502 |
| 1  | 0 | -1.955831 | 0.494912  | -4.208609 |
| 1  | 0 | -2.587115 | -1.013781 | -3.523871 |
| 1  | 0 | -4.551998 | 0.639981  | -3.016361 |
| 1  | 0 | -3.637486 | 2.108063  | -3.362144 |
| 1  | 0 | -4.376572 | 1.874250  | -1.766193 |
| 1  | 0 | -1.817297 | 1.463616  | -1.907465 |
| 1  | 0 | -4.376688 | -1.216947 | -1.774052 |
| 1  | 0 | -4.775303 | -2.722206 | 0.139019  |
| 1  | 0 | -3.323235 | -2.593651 | 2.129399  |
| 1  | 0 | -0.511474 | -0.198323 | 2.582950  |
| 1  | 0 | -1.129889 | -3.187934 | 2.835531  |
| 1  | 0 | 0.209359  | -2.316095 | 3.599630  |
| 1  | 0 | 0.153843  | -2.480741 | 1.834575  |
| 1  | 0 | -2.668974 | 0.094089  | 3.937560  |
| 1  | 0 | -1.371447 | -0.745531 | 4.809155  |
| 1  | 0 | -2.722473 | -1.660957 | 4.135862  |
| 1  | 0 | -2.912956 | 1.772759  | 2.246414  |
| 1  | 0 | -2.140191 | 3.319183  | 2.629259  |
| 1  | 0 | -1.305059 | 1.807983  | 3.006062  |
| 1  | 0 | -1.833971 | 3.317266  | -1.029920 |
| 1  | 0 | -2.468188 | 4.103285  | 0.414890  |
| 1  | 0 | -3.208791 | 2.605988  | -0.151958 |
| 1  | 0 | 0.401654  | 3.101946  | 2.009451  |
| 1  | 0 | 0.041450  | 4.077968  | 0.592789  |

|   |   |          |           |           |
|---|---|----------|-----------|-----------|
| 1 | 0 | 2.393101 | 1.569409  | 1.769197  |
| 1 | 0 | 3.192974 | 1.673026  | 0.209982  |
| 1 | 0 | 3.227404 | 4.215038  | 0.450281  |
| 1 | 0 | 3.999767 | 3.376885  | 1.795429  |
| 1 | 0 | 2.388295 | 4.060543  | 1.997088  |
| 1 | 0 | 1.743903 | 1.755881  | -1.847066 |
| 1 | 0 | 0.152416 | 2.473142  | -1.774972 |
| 1 | 0 | 1.290482 | 4.738726  | -1.188559 |
| 1 | 0 | 1.569854 | 4.085020  | -2.805955 |
| 1 | 0 | 2.829933 | 3.951988  | -1.582276 |
| 6 | 0 | 2.616325 | -0.800354 | 1.065197  |
| 8 | 0 | 3.267597 | -0.988182 | 1.999661  |

TS1

|   |   |           |           |           |
|---|---|-----------|-----------|-----------|
| 6 | 0 | 0.904056  | 2.914157  | -2.140214 |
| 6 | 0 | 0.405617  | 4.572841  | -0.326345 |
| 6 | 0 | 0.230756  | 3.099172  | -0.760954 |
| 6 | 0 | -1.239306 | 2.676411  | -0.784346 |
| 6 | 0 | -2.077795 | 3.381214  | -1.661612 |
| 6 | 0 | -3.421225 | 3.064513  | -1.811427 |
| 6 | 0 | -3.957737 | 2.008101  | -1.084023 |
| 6 | 0 | -3.183147 | 1.263607  | -0.185685 |
| 6 | 0 | -1.811151 | 1.614164  | -0.035661 |
| 6 | 0 | -3.884629 | 0.108523  | 0.535416  |
| 6 | 0 | -4.330166 | -0.982272 | -0.464487 |
| 6 | 0 | -5.118833 | 0.570204  | 1.343698  |
| 6 | 0 | -0.901429 | 1.472599  | 2.403780  |
| 6 | 0 | -2.173423 | 2.189953  | 2.856809  |
| 6 | 0 | 0.285811  | 2.444604  | 2.508656  |
| 6 | 0 | -0.494448 | -0.308738 | 0.842377  |

|    |   |           |           |           |
|----|---|-----------|-----------|-----------|
| 6  | 0 | 0.038159  | -0.800457 | 2.222509  |
| 6  | 0 | -0.649389 | 0.184952  | 3.193199  |
| 6  | 0 | -0.438100 | -2.251084 | 2.522114  |
| 6  | 0 | -0.147318 | -2.778857 | 3.934586  |
| 6  | 0 | 1.609036  | -0.722240 | 2.199536  |
| 6  | 0 | 2.331306  | -0.444451 | 3.526469  |
| 17 | 0 | 0.651466  | -3.054775 | -2.456074 |
| 77 | 0 | -0.172083 | -1.455503 | -0.808514 |
| 7  | 0 | -1.032302 | 0.892313  | 0.977243  |
| 6  | 0 | -0.884947 | -0.361590 | -2.126710 |
| 8  | 0 | -1.375431 | 0.150984  | -3.035466 |
| 6  | 0 | -1.420380 | -2.924839 | -0.325633 |
| 8  | 0 | -2.180047 | -3.776274 | -0.211128 |
| 1  | 0 | 0.771760  | 1.906040  | -2.537887 |
| 1  | 0 | 1.979905  | 3.100241  | -2.052729 |
| 1  | 0 | 0.494976  | 3.616088  | -2.875972 |
| 1  | 0 | 0.041699  | 5.256561  | -1.102043 |
| 1  | 0 | 1.468115  | 4.789584  | -0.168055 |
| 1  | 0 | -0.135052 | 4.813808  | 0.594942  |
| 1  | 0 | 0.767645  | 2.469970  | -0.048592 |
| 1  | 0 | -1.656544 | 4.190992  | -2.248881 |
| 1  | 0 | -4.044480 | 3.628299  | -2.500420 |
| 1  | 0 | -5.004488 | 1.751844  | -1.216634 |
| 1  | 0 | -3.180551 | -0.350352 | 1.236424  |
| 1  | 0 | -5.124299 | -0.609507 | -1.121508 |
| 1  | 0 | -4.725321 | -1.852598 | 0.072699  |
| 1  | 0 | -3.509326 | -1.317694 | -1.102406 |
| 1  | 0 | -4.893370 | 1.393092  | 2.027990  |
| 1  | 0 | -5.513089 | -0.266601 | 1.932834  |
| 1  | 0 | -5.923146 | 0.908409  | 0.680841  |

|    |   |           |           |           |
|----|---|-----------|-----------|-----------|
| 1  | 0 | -2.409662 | 3.053304  | 2.227443  |
| 1  | 0 | -2.014583 | 2.554012  | 3.878291  |
| 1  | 0 | -3.033846 | 1.519840  | 2.874347  |
| 1  | 0 | 1.218871  | 2.024435  | 2.127979  |
| 1  | 0 | 0.433626  | 2.685376  | 3.567539  |
| 1  | 0 | 0.087510  | 3.381212  | 1.988516  |
| 1  | 0 | -1.612979 | -0.236540 | 3.506459  |
| 1  | 0 | -0.068905 | 0.373132  | 4.097771  |
| 1  | 0 | -1.522378 | -2.300885 | 2.351608  |
| 1  | 0 | 0.023677  | -2.938413 | 1.803268  |
| 1  | 0 | 0.921926  | -2.936023 | 4.101289  |
| 1  | 0 | -0.643274 | -3.746906 | 4.069222  |
| 1  | 0 | -0.519433 | -2.107380 | 4.717090  |
| 1  | 0 | 1.977879  | -1.670797 | 1.789204  |
| 1  | 0 | 1.946789  | 0.039595  | 1.492339  |
| 1  | 0 | 2.139346  | 0.569254  | 3.894167  |
| 1  | 0 | 3.409724  | -0.518379 | 3.350896  |
| 1  | 0 | 2.066252  | -1.146782 | 4.321586  |
| 6  | 0 | 1.693164  | -0.374167 | -1.167422 |
| 1  | 0 | 1.997210  | -0.409884 | -2.210640 |
| 1  | 0 | 1.641024  | 0.634757  | -0.782003 |
| 1  | 0 | 2.321737  | -1.040085 | -0.554903 |
| 53 | 0 | 4.518558  | 0.714190  | -0.194886 |

C-4

|   |   |           |           |           |
|---|---|-----------|-----------|-----------|
| 6 | 0 | -1.434039 | -3.072715 | -2.691081 |
| 6 | 0 | -3.669550 | -1.984947 | -3.032748 |
| 6 | 0 | -2.353764 | -1.925307 | -2.220262 |
| 6 | 0 | -2.636691 | -1.972180 | -0.717883 |
| 6 | 0 | -3.225843 | -3.148286 | -0.227693 |



|    |   |           |           |           |
|----|---|-----------|-----------|-----------|
| 6  | 0 | -3.555364 | -3.306954 | 1.111411  |
| 6  | 0 | -3.285926 | -2.275087 | 2.002992  |
| 6  | 0 | -2.692612 | -1.076388 | 1.587247  |
| 6  | 0 | -2.367462 | -0.934118 | 0.207657  |
| 6  | 0 | -2.405222 | -0.043426 | 2.684171  |
| 6  | 0 | -1.423847 | -0.602606 | 3.740052  |
| 6  | 0 | -3.677877 | 0.436371  | 3.417853  |
| 6  | 0 | -2.918606 | 1.398189  | -0.752597 |
| 6  | 0 | -4.337858 | 1.137039  | -0.250361 |
| 6  | 0 | -2.927508 | 1.397078  | -2.293964 |
| 6  | 0 | -0.665799 | 0.911332  | -0.093818 |
| 6  | 0 | -0.786831 | 2.470261  | -0.214485 |
| 6  | 0 | -2.318284 | 2.682391  | -0.190573 |
| 6  | 0 | -0.160332 | 3.121205  | 1.056083  |
| 6  | 0 | -0.368074 | 4.638277  | 1.175310  |
| 6  | 0 | -0.081465 | 3.024150  | -1.510656 |
| 17 | 0 | 0.944135  | -0.505887 | -2.301191 |
| 77 | 0 | 1.228903  | -0.005563 | 0.087534  |
| 7  | 0 | -1.873374 | 0.381665  | -0.225045 |
| 6  | 0 | -0.775771 | 4.162920  | -2.275781 |
| 6  | 0 | 1.497013  | 0.301133  | 1.910517  |
| 8  | 0 | 1.683005  | 0.500511  | 3.029244  |
| 6  | 0 | 0.502613  | -1.951961 | 0.612294  |
| 53 | 0 | 3.808155  | -1.220547 | 0.088646  |
| 1  | 0 | -0.466599 | -3.052929 | -2.187602 |
| 1  | 0 | -1.243588 | -2.966367 | -3.765583 |
| 1  | 0 | -1.895281 | -4.054495 | -2.530441 |
| 1  | 0 | -4.117250 | -2.984410 | -2.977848 |
| 1  | 0 | -3.470947 | -1.771718 | -4.090133 |
| 1  | 0 | -4.426292 | -1.276992 | -2.677062 |

|   |   |           |           |           |
|---|---|-----------|-----------|-----------|
| 1 | 0 | -1.827697 | -0.996787 | -2.446373 |
| 1 | 0 | -3.427821 | -3.958868 | -0.920999 |
| 1 | 0 | -4.012870 | -4.229137 | 1.460120  |
| 1 | 0 | -3.533151 | -2.404462 | 3.052402  |
| 1 | 0 | -1.936468 | 0.832696  | 2.229476  |
| 1 | 0 | -1.899891 | -1.388759 | 4.337268  |
| 1 | 0 | -1.114358 | 0.193203  | 4.427644  |
| 1 | 0 | -0.526772 | -1.030163 | 3.289800  |
| 1 | 0 | -4.422333 | 0.873385  | 2.746404  |
| 1 | 0 | -3.411031 | 1.195192  | 4.163576  |
| 1 | 0 | -4.162767 | -0.389440 | 3.950883  |
| 1 | 0 | -4.721221 | 0.165841  | -0.575242 |
| 1 | 0 | -4.990428 | 1.912253  | -0.669148 |
| 1 | 0 | -4.412310 | 1.192428  | 0.835695  |
| 1 | 0 | -1.922555 | 1.408952  | -2.720349 |
| 1 | 0 | -3.461763 | 2.290625  | -2.635961 |
| 1 | 0 | -3.456618 | 0.533735  | -2.693555 |
| 1 | 0 | -2.653658 | 2.807540  | 0.846499  |
| 1 | 0 | -2.647970 | 3.562841  | -0.743480 |
| 1 | 0 | -0.583953 | 2.639410  | 1.947609  |
| 1 | 0 | 0.914113  | 2.919908  | 1.080510  |
| 1 | 0 | 0.135426  | 5.184455  | 0.370914  |
| 1 | 0 | 0.053534  | 4.992262  | 2.123045  |
| 1 | 0 | -1.428192 | 4.917235  | 1.162979  |
| 1 | 0 | 0.900239  | 3.401087  | -1.216708 |
| 1 | 0 | 0.114105  | 2.201520  | -2.205728 |
| 1 | 0 | -0.102113 | 4.516363  | -3.065434 |
| 1 | 0 | -1.008192 | 5.020735  | -1.635502 |
| 1 | 0 | -1.701990 | 3.846620  | -2.764281 |
| 1 | 0 | -0.299677 | -1.961290 | 1.346027  |

|   |   |          |           |           |
|---|---|----------|-----------|-----------|
| 1 | 0 | 1.346082 | -2.525579 | 0.999556  |
| 1 | 0 | 0.155294 | -2.417731 | -0.308363 |
| 6 | 0 | 2.354841 | 1.532747  | -0.565621 |
| 8 | 0 | 3.136758 | 2.290979  | -0.915719 |

TS2

|    |   |           |           |           |
|----|---|-----------|-----------|-----------|
| 6  | 0 | -0.579003 | -3.091967 | -2.661829 |
| 6  | 0 | -2.928538 | -2.380904 | -3.211400 |
| 6  | 0 | -1.710438 | -2.108599 | -2.297778 |
| 6  | 0 | -2.128679 | -2.178237 | -0.829381 |
| 6  | 0 | -2.496984 | -3.438183 | -0.331351 |
| 6  | 0 | -2.947557 | -3.614584 | 0.970630  |
| 6  | 0 | -3.079405 | -2.506618 | 1.800779  |
| 6  | 0 | -2.747112 | -1.216787 | 1.365297  |
| 6  | 0 | -2.216793 | -1.070732 | 0.050732  |
| 6  | 0 | -3.044300 | -0.065639 | 2.334846  |
| 6  | 0 | -2.162688 | -0.087467 | 3.599541  |
| 6  | 0 | -4.529786 | -0.066532 | 2.770439  |
| 6  | 0 | -2.883332 | 1.192632  | -1.069886 |
| 6  | 0 | -4.332766 | 0.801799  | -0.788291 |
| 6  | 0 | -2.638944 | 1.167787  | -2.591740 |
| 6  | 0 | -0.710398 | 0.926822  | -0.109043 |
| 6  | 0 | -0.961380 | 2.463685  | -0.222879 |
| 6  | 0 | -2.491736 | 2.538490  | -0.465978 |
| 6  | 0 | -0.644119 | 3.079419  | 1.178531  |
| 6  | 0 | -0.976043 | 4.572619  | 1.308292  |
| 6  | 0 | -0.093264 | 3.154367  | -1.340640 |
| 17 | 0 | 1.142448  | -0.063667 | -2.330592 |
| 77 | 0 | 1.213464  | 0.109596  | 0.182698  |
| 7  | 0 | -1.845605 | 0.288356  | -0.362267 |

|    |   |           |           |           |
|----|---|-----------|-----------|-----------|
| 6  | 0 | -0.762466 | 4.248618  | -2.187894 |
| 53 | 0 | 3.831279  | -0.945331 | 0.121367  |
| 6  | 0 | 2.150934  | 1.727730  | 0.133656  |
| 8  | 0 | 2.810973  | 2.669148  | 0.201346  |
| 1  | 0 | 0.322815  | -2.916947 | -2.071234 |
| 1  | 0 | -0.300693 | -2.948643 | -3.711889 |
| 1  | 0 | -0.885268 | -4.137647 | -2.537884 |
| 1  | 0 | -3.255710 | -3.424608 | -3.129191 |
| 1  | 0 | -2.661760 | -2.198030 | -4.259379 |
| 1  | 0 | -3.791381 | -1.752123 | -2.964035 |
| 1  | 0 | -1.324075 | -1.110602 | -2.504065 |
| 1  | 0 | -2.420263 | -4.300875 | -0.985514 |
| 1  | 0 | -3.210181 | -4.605514 | 1.331757  |
| 1  | 0 | -3.461295 | -2.640921 | 2.808346  |
| 1  | 0 | -2.851796 | 0.878838  | 1.821307  |
| 1  | 0 | -2.289070 | -1.024638 | 4.154413  |
| 1  | 0 | -2.452566 | 0.732943  | 4.267810  |
| 1  | 0 | -1.101993 | 0.022686  | 3.374794  |
| 1  | 0 | -5.218857 | -0.167987 | 1.926461  |
| 1  | 0 | -4.764570 | 0.866562  | 3.296965  |
| 1  | 0 | -4.738234 | -0.890367 | 3.462459  |
| 1  | 0 | -4.547374 | -0.227104 | -1.092227 |
| 1  | 0 | -4.981413 | 1.463221  | -1.374135 |
| 1  | 0 | -4.603206 | 0.920766  | 0.261177  |
| 1  | 0 | -1.582155 | 1.280545  | -2.844696 |
| 1  | 0 | -3.198478 | 1.994571  | -3.044207 |
| 1  | 0 | -3.001623 | 0.245149  | -3.045918 |
| 1  | 0 | -3.010810 | 2.666499  | 0.491252  |
| 1  | 0 | -2.792427 | 3.369485  | -1.104021 |
| 1  | 0 | -1.204698 | 2.523597  | 1.941683  |

|   |   |           |           |           |
|---|---|-----------|-----------|-----------|
| 1 | 0 | 0.411957  | 2.934643  | 1.417825  |
| 1 | 0 | -0.360985 | 5.186178  | 0.641975  |
| 1 | 0 | -0.778526 | 4.904904  | 2.333895  |
| 1 | 0 | -2.029091 | 4.785514  | 1.089918  |
| 1 | 0 | 0.774521  | 3.610363  | -0.857997 |
| 1 | 0 | 0.307031  | 2.392901  | -2.015271 |
| 1 | 0 | -0.000896 | 4.711586  | -2.826467 |
| 1 | 0 | -1.209699 | 5.043912  | -1.581191 |
| 1 | 0 | -1.537214 | 3.852817  | -2.852631 |
| 6 | 0 | 1.111323  | -0.482963 | 1.963150  |
| 8 | 0 | 1.171077  | -0.551518 | 3.130970  |
| 6 | 0 | 0.655667  | -2.071798 | 1.015552  |
| 1 | 0 | -0.285789 | -2.285379 | 1.513451  |
| 1 | 0 | 1.496081  | -2.637517 | 1.414964  |
| 1 | 0 | 0.573245  | -2.290057 | -0.051431 |

C-5

|   |   |          |           |           |
|---|---|----------|-----------|-----------|
| 6 | 0 | 0.542225 | -1.893516 | 3.390183  |
| 6 | 0 | 2.741144 | -0.745361 | 3.814357  |
| 6 | 0 | 1.561008 | -0.883207 | 2.825660  |
| 6 | 0 | 2.066807 | -1.264363 | 1.435485  |
| 6 | 0 | 2.619810 | -2.545078 | 1.277551  |
| 6 | 0 | 3.165155 | -2.963542 | 0.071073  |
| 6 | 0 | 3.198673 | -2.084240 | -1.006309 |
| 6 | 0 | 2.668850 | -0.792198 | -0.917505 |
| 6 | 0 | 2.063015 | -0.405623 | 0.310408  |
| 6 | 0 | 2.832240 | 0.119477  | -2.141214 |
| 6 | 0 | 1.976398 | -0.301532 | -3.352501 |
| 6 | 0 | 4.312966 | 0.205310  | -2.582567 |
| 6 | 0 | 2.294553 | 2.167114  | 0.753817  |

|    |   |           |           |           |
|----|---|-----------|-----------|-----------|
| 6  | 0 | 3.796516  | 2.017288  | 0.508764  |
| 6  | 0 | 2.074404  | 2.482092  | 2.248734  |
| 6  | 0 | 0.219977  | 1.219669  | -0.002853 |
| 6  | 0 | 0.147880  | 2.746671  | -0.333565 |
| 6  | 0 | 1.627178  | 3.206644  | -0.146017 |
| 6  | 0 | -0.244821 | 2.858154  | -1.837318 |
| 6  | 0 | -0.112771 | 4.266247  | -2.438670 |
| 6  | 0 | -0.778060 | 3.657691  | 0.542310  |
| 6  | 0 | -2.292071 | 3.658422  | 0.309733  |
| 17 | 0 | -1.556261 | 0.961411  | 2.429884  |
| 77 | 0 | -1.289450 | -0.264635 | 0.329563  |
| 7  | 0 | 1.467496  | 0.935108  | 0.358469  |
| 6  | 0 | -2.965198 | 0.429088  | -0.615012 |
| 8  | 0 | -3.975310 | 0.628637  | 0.004599  |
| 6  | 0 | -2.932501 | 0.583236  | -2.132379 |
| 53 | 0 | -0.808765 | -2.196315 | -1.596179 |
| 1  | 0 | -0.279884 | -2.071681 | 2.692454  |
| 1  | 0 | 0.110042  | -1.504560 | 4.318600  |
| 1  | 0 | 1.007248  | -2.860828 | 3.614237  |
| 1  | 0 | 3.212534  | -1.718412 | 3.998059  |
| 1  | 0 | 2.386109  | -0.358807 | 4.777561  |
| 1  | 0 | 3.521909  | -0.072492 | 3.442700  |
| 1  | 0 | 1.047520  | 0.077260  | 2.761554  |
| 1  | 0 | 2.618050  | -3.226432 | 2.123006  |
| 1  | 0 | 3.572404  | -3.966410 | -0.027739 |
| 1  | 0 | 3.642069  | -2.410288 | -1.942462 |
| 1  | 0 | 2.513573  | 1.126821  | -1.865111 |
| 1  | 0 | 2.206007  | -1.326843 | -3.664418 |
| 1  | 0 | 2.187390  | 0.363504  | -4.199953 |
| 1  | 0 | 0.907368  | -0.261999 | -3.135184 |

|     |   |           |           |           |
|-----|---|-----------|-----------|-----------|
| 1   | 0 | 4.990520  | 0.403661  | -1.745825 |
| 1   | 0 | 4.437008  | 1.004690  | -3.323638 |
| 1   | 0 | 4.640705  | -0.727462 | -3.055427 |
| 1   | 0 | 4.211245  | 1.155030  | 1.040572  |
| 1   | 0 | 4.294987  | 2.914595  | 0.892964  |
| 1   | 0 | 4.046847  | 1.928693  | -0.548075 |
| 1   | 0 | 1.020785  | 2.443277  | 2.532384  |
| 1   | 0 | 2.451815  | 3.491713  | 2.449181  |
| 1   | 0 | 2.626953  | 1.792920  | 2.890497  |
| 1   | 0 | 2.142991  | 3.226924  | -1.112956 |
| 1   | 0 | 1.700333  | 4.210235  | 0.280468  |
| 1   | 0 | 0.376332  | 2.165595  | -2.420070 |
| 1   | 0 | -1.274436 | 2.523502  | -1.961448 |
| 1   | 0 | -0.777635 | 4.986063  | -1.950056 |
| 1   | 0 | -0.381682 | 4.238634  | -3.501216 |
| 1   | 0 | 0.909550  | 4.656073  | -2.372008 |
| 1   | 0 | -0.592208 | 3.444735  | 1.597162  |
| 1   | 0 | -0.418127 | 4.680084  | 0.370948  |
| 1   | 0 | -2.560590 | 3.890849  | -0.727354 |
| 1   | 0 | -2.740115 | 4.438250  | 0.938002  |
| 1   | 0 | -2.760418 | 2.717814  | 0.593818  |
| 1   | 0 | -1.932102 | 0.598159  | -2.553966 |
| 1   | 0 | -3.500265 | 1.480094  | -2.403129 |
| 1   | 0 | -3.452751 | -0.294239 | -2.534930 |
| 6   | 0 | -2.445417 | -1.601278 | 1.079342  |
| 8   | 0 | -3.100152 | -2.389875 | 1.591093  |
| TS3 |   |           |           |           |
| 6   | 0 | -1.067342 | -2.803491 | -3.064478 |
| 6   | 0 | -3.533021 | -2.617877 | -2.649512 |

|    |   |           |           |           |
|----|---|-----------|-----------|-----------|
| 6  | 0 | -2.140985 | -2.113886 | -2.196481 |
| 6  | 0 | -1.944655 | -2.351251 | -0.698444 |
| 6  | 0 | -1.879104 | -3.693509 | -0.291365 |
| 6  | 0 | -1.747864 | -4.056104 | 1.042728  |
| 6  | 0 | -1.678696 | -3.059906 | 2.008682  |
| 6  | 0 | -1.735865 | -1.699882 | 1.674955  |
| 6  | 0 | -1.862587 | -1.344334 | 0.300489  |
| 6  | 0 | -1.640273 | -0.717129 | 2.845315  |
| 6  | 0 | -0.322557 | -0.909287 | 3.629236  |
| 6  | 0 | -2.819475 | -0.858675 | 3.835450  |
| 6  | 0 | -3.354967 | 0.748677  | -0.222950 |
| 6  | 0 | -4.447970 | 0.100509  | 0.626858  |
| 6  | 0 | -3.795106 | 0.735519  | -1.700641 |
| 6  | 0 | -0.970318 | 0.954579  | -0.021033 |
| 6  | 0 | -1.530722 | 2.400511  | -0.082791 |
| 6  | 0 | -3.028676 | 2.178493  | 0.226834  |
| 6  | 0 | -0.885978 | 3.281271  | 1.025014  |
| 6  | 0 | -1.479732 | 4.687206  | 1.195903  |
| 6  | 0 | -1.213689 | 2.985087  | -1.508695 |
| 77 | 0 | 0.969040  | 0.586451  | -0.111347 |
| 7  | 0 | -1.981152 | 0.083192  | -0.025074 |
| 6  | 0 | -2.207111 | 4.002847  | -2.091116 |
| 6  | 0 | 1.315240  | 1.163768  | 1.595282  |
| 8  | 0 | 1.591675  | 1.587985  | 2.644544  |
| 1  | 0 | -0.063505 | -2.471960 | -2.797059 |
| 1  | 0 | -1.228546 | -2.543534 | -4.117702 |
| 1  | 0 | -1.118537 | -3.896065 | -2.984747 |
| 1  | 0 | -3.566714 | -3.714173 | -2.646949 |
| 1  | 0 | -3.745313 | -2.283881 | -3.672679 |
| 1  | 0 | -4.344728 | -2.273477 | -1.999997 |



|    |   |           |           |           |
|----|---|-----------|-----------|-----------|
| 1  | 0 | -2.057794 | -1.044225 | -2.391849 |
| 1  | 0 | -1.940724 | -4.471703 | -1.045923 |
| 1  | 0 | -1.703476 | -5.104374 | 1.327752  |
| 1  | 0 | -1.573544 | -3.341094 | 3.052058  |
| 1  | 0 | -1.650761 | 0.302883  | 2.451088  |
| 1  | 0 | -0.348458 | -1.836928 | 4.213493  |
| 1  | 0 | -0.172846 | -0.080679 | 4.330412  |
| 1  | 0 | 0.543247  | -0.958950 | 2.968202  |
| 1  | 0 | -3.797954 | -0.766928 | 3.355916  |
| 1  | 0 | -2.746529 | -0.087239 | 4.611953  |
| 1  | 0 | -2.794024 | -1.832437 | 4.338504  |
| 1  | 0 | -4.591939 | -0.956078 | 0.379416  |
| 1  | 0 | -5.393000 | 0.622011  | 0.434841  |
| 1  | 0 | -4.234250 | 0.182460  | 1.693204  |
| 1  | 0 | -3.003412 | 1.066424  | -2.375580 |
| 1  | 0 | -4.642826 | 1.422036  | -1.809221 |
| 1  | 0 | -4.135153 | -0.247597 | -2.021086 |
| 1  | 0 | -3.181899 | 2.256739  | 1.310716  |
| 1  | 0 | -3.688562 | 2.909095  | -0.245510 |
| 1  | 0 | -0.973380 | 2.752029  | 1.983041  |
| 1  | 0 | 0.184276  | 3.374693  | 0.819579  |
| 1  | 0 | -1.265392 | 5.331406  | 0.337479  |
| 1  | 0 | -1.036129 | 5.164394  | 2.077688  |
| 1  | 0 | -2.566384 | 4.670202  | 1.345011  |
| 1  | 0 | -0.218291 | 3.440588  | -1.451660 |
| 1  | 0 | -1.097674 | 2.167697  | -2.226566 |
| 1  | 0 | -1.792473 | 4.418617  | -3.017443 |
| 1  | 0 | -2.411067 | 4.839671  | -1.416659 |
| 1  | 0 | -3.167825 | 3.543597  | -2.349849 |
| 53 | 0 | 3.815320  | 0.004719  | -0.323718 |

|    |   |          |           |           |
|----|---|----------|-----------|-----------|
| 17 | 0 | 0.766182 | 0.079113  | -2.450342 |
| 6  | 0 | 2.545081 | -1.848394 | 0.545762  |
| 8  | 0 | 2.568371 | -2.015139 | 1.711972  |
| 6  | 0 | 2.121184 | -2.750866 | -0.572736 |
| 1  | 0 | 2.923949 | -3.489337 | -0.704765 |
| 1  | 0 | 1.962992 | -2.201572 | -1.498122 |
| 1  | 0 | 1.204323 | -3.262403 | -0.260594 |

C-6

|   |   |           |           |           |
|---|---|-----------|-----------|-----------|
| 6 | 0 | -0.732619 | -3.390408 | -2.025219 |
| 6 | 0 | -3.013795 | -2.891325 | -2.958150 |
| 6 | 0 | -1.913453 | -2.394102 | -1.993441 |
| 6 | 0 | -2.429320 | -2.213736 | -0.567099 |
| 6 | 0 | -2.918524 | -3.366814 | 0.067290  |
| 6 | 0 | -3.362004 | -3.353261 | 1.382495  |
| 6 | 0 | -3.289042 | -2.169632 | 2.107174  |
| 6 | 0 | -2.812555 | -0.981561 | 1.537658  |
| 6 | 0 | -2.405543 | -1.003229 | 0.172189  |
| 6 | 0 | -2.714368 | 0.225064  | 2.475227  |
| 6 | 0 | -1.744421 | -0.083543 | 3.639103  |
| 6 | 0 | -4.072523 | 0.658675  | 3.069452  |
| 6 | 0 | -3.183800 | 1.046138  | -1.225448 |
| 6 | 0 | -4.588865 | 0.785227  | -0.680038 |
| 6 | 0 | -3.160590 | 0.683386  | -2.722653 |
| 6 | 0 | -0.956933 | 0.972987  | -0.340611 |
| 6 | 0 | -1.182064 | 2.440136  | -0.786226 |
| 6 | 0 | -2.719831 | 2.489896  | -0.994206 |
| 6 | 0 | -0.775916 | 3.414613  | 0.354970  |
| 6 | 0 | -1.168303 | 4.878628  | 0.105851  |
| 6 | 0 | -0.407942 | 2.774608  | -2.109315 |

|    |   |           |           |           |
|----|---|-----------|-----------|-----------|
| 6  | 0 | 1.068129  | 3.175865  | -1.983268 |
| 17 | 0 | 1.117338  | -0.544015 | -2.106390 |
| 77 | 0 | 0.785740  | 0.223838  | 0.173065  |
| 7  | 0 | -2.093827 | 0.284411  | -0.461209 |
| 1  | 0 | 0.055817  | -3.097701 | -1.329015 |
| 1  | 0 | -0.295295 | -3.416195 | -3.030051 |
| 1  | 0 | -1.063309 | -4.406041 | -1.774676 |
| 1  | 0 | -3.300030 | -3.925595 | -2.732117 |
| 1  | 0 | -2.644825 | -2.871965 | -3.990976 |
| 1  | 0 | -3.927279 | -2.288759 | -2.911351 |
| 1  | 0 | -1.529191 | -1.437525 | -2.351065 |
| 1  | 0 | -2.942669 | -4.298848 | -0.489110 |
| 1  | 0 | -3.743329 | -4.260060 | 1.845393  |
| 1  | 0 | -3.603855 | -2.165696 | 3.146495  |
| 1  | 0 | -2.307831 | 1.073611  | 1.919024  |
| 1  | 0 | -2.187130 | -0.809408 | 4.331837  |
| 1  | 0 | -1.523312 | 0.828171  | 4.205070  |
| 1  | 0 | -0.800765 | -0.497074 | 3.277417  |
| 1  | 0 | -4.815002 | 0.907236  | 2.305594  |
| 1  | 0 | -3.933680 | 1.542466  | 3.704348  |
| 1  | 0 | -4.501464 | -0.130949 | 3.697424  |
| 1  | 0 | -4.876519 | -0.266698 | -0.771853 |
| 1  | 0 | -5.301441 | 1.381420  | -1.262305 |
| 1  | 0 | -4.684062 | 1.081010  | 0.365422  |
| 1  | 0 | -2.157384 | 0.739083  | -3.150214 |
| 1  | 0 | -3.801428 | 1.391477  | -3.261478 |
| 1  | 0 | -3.555762 | -0.316521 | -2.901310 |
| 1  | 0 | -3.200827 | 2.873762  | -0.086266 |
| 1  | 0 | -3.015087 | 3.143764  | -1.819938 |
| 1  | 0 | -1.246915 | 3.081817  | 1.289078  |

|    |   |           |           |           |
|----|---|-----------|-----------|-----------|
| 1  | 0 | 0.302070  | 3.348351  | 0.519371  |
| 1  | 0 | -0.697691 | 5.286021  | -0.795608 |
| 1  | 0 | -0.847658 | 5.497198  | 0.952363  |
| 1  | 0 | -2.252380 | 5.005985  | 0.001026  |
| 1  | 0 | -0.465274 | 1.915203  | -2.783607 |
| 1  | 0 | -0.952340 | 3.590735  | -2.602495 |
| 1  | 0 | 1.196577  | 4.139352  | -1.477948 |
| 1  | 0 | 1.504026  | 3.268115  | -2.985470 |
| 1  | 0 | 1.640581  | 2.421438  | -1.435971 |
| 6  | 0 | 4.798827  | -0.036948 | -0.542023 |
| 8  | 0 | 5.471564  | 0.827372  | -0.106394 |
| 6  | 0 | 4.705244  | -0.621172 | -1.913112 |
| 1  | 0 | 4.947842  | -1.687898 | -1.866804 |
| 1  | 0 | 5.398868  | -0.091542 | -2.573594 |
| 1  | 0 | 3.667973  | -0.537249 | -2.264095 |
| 53 | 0 | 3.290270  | -1.092735 | 0.901937  |
| 6  | 0 | 0.820022  | 1.033013  | 1.810361  |
| 8  | 0 | 0.928046  | 1.609034  | 2.820165  |

CH<sub>3</sub>COI

|    |   |           |           |           |
|----|---|-----------|-----------|-----------|
| 6  | 0 | -1.126438 | 0.045122  | -0.122039 |
| 6  | 0 | 0.343494  | 0.217732  | -0.398159 |
| 53 | 0 | 1.578114  | 0.179957  | 1.494889  |
| 8  | 0 | 0.874922  | 0.361869  | -1.448386 |
| 1  | 0 | -1.674614 | 0.071020  | -1.068458 |
| 1  | 0 | -1.468615 | 0.844189  | 0.543040  |
| 1  | 0 | -1.291284 | -0.906776 | 0.392398  |

CH<sub>3</sub>CO<sub>2</sub>CH<sub>3</sub>

|   |   |           |           |           |
|---|---|-----------|-----------|-----------|
| 6 | 0 | -1.802454 | -0.523152 | -0.000001 |
| 6 | 0 | -0.464444 | 0.175584  | 0.000045  |
| 8 | 0 | 0.553230  | -0.717585 | 0.000015  |
| 8 | 0 | -0.294574 | 1.377699  | -0.000044 |
| 6 | 0 | 1.881526  | -0.161445 | -0.000005 |
| 1 | 0 | -2.601048 | 0.220002  | -0.000364 |
| 1 | 0 | -1.892366 | -1.165322 | 0.882848  |
| 1 | 0 | -1.892056 | -1.165899 | -0.882458 |
| 1 | 0 | 2.037379  | 0.452153  | 0.891398  |
| 1 | 0 | 2.553722  | -1.019942 | -0.000025 |
| 1 | 0 | 2.037346  | 0.452168  | -0.891404 |

CH<sub>3</sub>I

|    |   |           |           |           |
|----|---|-----------|-----------|-----------|
| 6  | 0 | -0.965323 | -0.000024 | 0.298735  |
| 53 | 0 | 1.217403  | 0.000043  | 0.298927  |
| 1  | 0 | -1.293658 | -0.000031 | -0.739037 |
| 1  | 0 | -1.293692 | 0.898485  | 0.817966  |
| 1  | 0 | -1.293483 | -0.898865 | 0.817435  |

### 13. TGA curves for C-2 and C-3

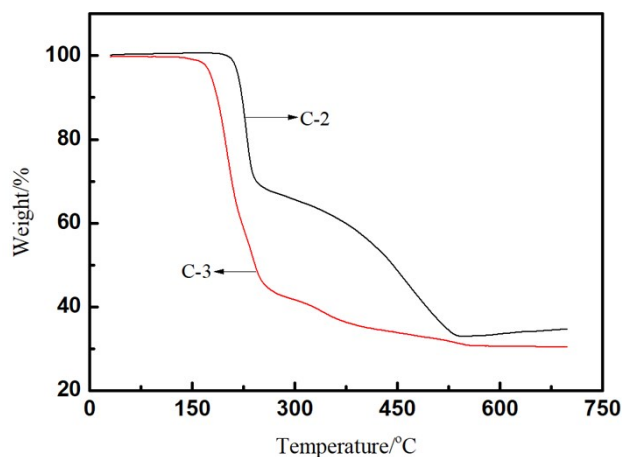

Fig.S6 TGA curves for C-2 and C-3

### 14. References

- (S1) S. Grimme, S. Ehrlich, L. Goerigk, *J. Comput. Chem.* **2011**, *32*, 1456-1465.
- (S2) R. Sure, J. Antony, S. Grimme, *J. Phys. Chem. B* **2014**, *118*, 3431-3440.
- Kelly Iii, Roy A., et al. *Organometallics* *27.2* (2008): 202-210.
- (S3) M. J. Turner, S. Grabowsky, D. Jaytilaka, M. A. Spackman, *J. Phys. Chem. Lett.* **2014**, *5*, 4249-4255.
- (S4) Z. Li, K. Su, J. Ren, D. Yang, B. Cheng, C. K. Kim, X. Yao, *Green Chem.*, **2018**, *20*, 863-872.
- (S5) M. J. Frisch, G. W. Trucks, H. B. Schlegel, G. E. Scuseria, M. A. Robb, J. R. Cheeseman, J. A. Montgomery, Jr., T. Vreven, K. N. Kudin, J. C. Burant, J. M. Millam, S. S. Iyengar, J. Tomasi, V. Barone, B. Mennucci, M. Cossi, G. Scalmani, N. Rega, G. A. Petersson, H. Nakatsuji, M. Hada, M. Ehara, K. Toyota, R. Fukuda, J. Hasegawa, M. Ishida, T. Nakajima, Y. Honda, O. Kitao, H. Nakai, M. Klene, X. Li, J. E. Knox, H. P. Hratchian, J. B. Cross, V. Bakken, C. Adamo, J. Jaramillo, R. Gomperts, R. E. Stratmann, O. Yazyev, A. J. Austin, R. Cammi, C. Pomelli, J. Ochterski, P. Y. Ayala, K. Morokuma, G. A. Voth, P. Salvador, J. J. Dannenberg, V. G. Zakrzewski, S. Dapprich, A. D. Daniels, M. C. Strain, O. Farkas, D. K. Malick, A. D. Rabuck, K. Raghavachari, J. B. Foresman, J. V. Ortiz, Q. Cui, A. G. Baboul, S. Clifford, J. Cioslowski, B. B. Stefanov, G. Liu, A. Liashenko, P. Piskorz, I. Komaromi, R. L. Martin, D. J. Fox, T. Keith, M. A. Al-Laham, C. Y. Peng, A. Nanayakkara, M. Challacombe, P. M. W. Gill, B. G. Johnson, W. Chen, M. W. Wong, C. Gonzalez, J. A. Pople, GAUSSIAN 09 (Revision E.01), Gaussian, Inc., Pittsburgh, PA, **2013**.
